# Supplementary material for: The Quorum Sensing Auto-Inducer 2 (AI-2) Stimulates Nitrogen Fixation and Favors Ethanol Production over Biomass Accumulation in Zymomonas mobilis
Source: MDPI journal article supplement (doi:10.3390/ijms22115628), 2021-05-26
Supplement: s1 [file s1]

**Supplementary Material S2 - Comparison of relative expression data obtained by RNA-seq and quantitative real-time PCR (qPCR).** To assess the reliability of the RNA-seq results, 20 genes were selected to have their relative expression ratios evaluated independently, by qPCR (see text for details). Qualitatively coincident comparisons are highlighted in green, while discrepancies are highlighted in red.

Alencar *et al.* (2021). The quorum sensing auto-inducer 2 (AI-2) stimulates nitrogen fixation and favors ethanol production over biomass accumulation in *Zymomonas mobilis*. *Int. J. Mol. Sci. Submitted*.

| LocusTag_ID | Description                                                         | 14h x 20h |       | 14h x 16h+AI-2 |       | 14h x 20h+AI-2 |       |
|-------------|---------------------------------------------------------------------|-----------|-------|----------------|-------|----------------|-------|
|             |                                                                     | RNA-seq   | qPCR  | RNA-seq        | qPCR  | RNA-seq        | qPCR  |
| ZMO_RS00220 | alpha/beta hydrolase                                                | -0.58     | -7.36 | 0.9            | 0.73  | 0.82           | 7.86  |
| ZMO_RS05560 | alcohol dehydrogenase                                               | 2.02      | 2.21  | 1.06           | 3.5   | 1.13           | 1.82  |
| ZMO_RS08755 | co-chaperonin GroES                                                 | -0.65     | -1.81 | 0.83           | 1.2   | -1.63          | -1.83 |
| ZMO_RS00205 | lysine exporter protein                                             | -0.42     | -3.15 | 0.25           | 1.47  | 0.99           | -1.85 |
| ZMO_RS08485 | glutaredoxin-like protein                                           | 0.32      | 0.76  | 0.64           | 0.04  | 0.13           | 0.71  |
| ZMO_RS05980 | LysR family transcriptional regulator                               | -0.07     | 2.83  | 0.97           | 1.98  | 0.24           | -1.73 |
| ZMO_RS04025 | TonB-dependent receptor                                             | -0.07     | -2.81 | 0.73           | 2.32  | 0.44           | 0.48  |
| ZMO_RS00175 | sigma 54 modulation protein/ribosomal protein S30EA                 | 1.17      | 0.2   | 0.36           | 2.53  | 0.73           | -0.42 |
| ZMO_RS07220 | phosphopyruvate hydratase                                           | -0.25     | -2.2  | -0.84          | 0.64  | -1.16          | -2.94 |
| ZMO_RS02370 | 30S ribosomal protein S13                                           | -1.26     | -4.62 | -1.93          | -1.51 | -1.99          | -5.29 |
| ZMO_RS06270 | peptidase M23                                                       | -0.73     | -0.76 | -1.59          | 0.41  | -1.76          | -0.52 |
| ZMO_RS04470 | 5-methyl-tetrahydropteroyltrimethylhomocysteine S-methyltransferase | -1.91     | -3.57 | -1.49          | -0.2  | -2.25          | -4.1  |
| ZMO_RS06320 | MucR family transcriptional regulator                               | -1.44     | -2.84 | -2.28          | -1.04 | -1.97          | -3.99 |
| ZMO_RS02245 | elongation factor G                                                 | -0.56     | 1.29  | -1.89          | -0.56 | -1.61          | -0.29 |
| ZMO_RS00755 | glyceraldehyde-3-phosphate dehydrogenase, type I                    | 0.24      | 0.43  | -0.49          | 0.66  | -0.52          | -0.56 |
| ZMO_RS03200 | transcription elongation factor GreB                                | -0.34     | 10.45 | 0.63           | 6.13  | 0.29           | 10.17 |
| ZMO_RS04395 | ABC transporter-like protein                                        | -0.46     | 2.37  | 0.13           | 0.64  | 0.12           | 6.81  |
| ZMO_RS01520 | rod shape-determining protein MreB                                  | -0.13     | -0.03 | -0.27          | 0.15  | -0.38          | -3.78 |
| ZMO_RS08860 | PhzF family phenazine biosynthesis protein                          | -0.09     | -4.11 | 1.64           | 1.2   | 1.16           | 9.24  |
| ZMO_RS01575 | phosphogluconate dehydratase                                        | 1.26      | 1.63  | 1.23           | 1.62  | 0.39           | 0.88  |
