# Supplementary material for: The Quorum Sensing Auto-Inducer 2 (AI-2) Stimulates Nitrogen Fixation and Favors Ethanol Production over Biomass Accumulation in Zymomonas mobilis
Source: MDPI journal article supplement (doi:10.3390/ijms22115628), 2021-05-26
Supplement: s1 [file s1]

**Supplementary Material S3** – Expression patterns of the 724 *Z. mobilis* genes identified as modulated in response to AI-2, distributed into different categories/subcategories, as defined by the *OMICS Dashboard* tool, available from the *Pathway Tools* software package. The total modulation in each category is shown as the sum of expression ratios (Log-transformed) involving all genes present in the category in question.

Alencar *et al.* (2021). The quorum sensing auto-inducer 2 (AI-2) stimulates nitrogen fixation and favors ethanol production over biomass accumulation in *Zymomonas mobilis*. *Int. J. Mol. Sci.* Submitted.

Supplementary Material S3A –Central Dogma

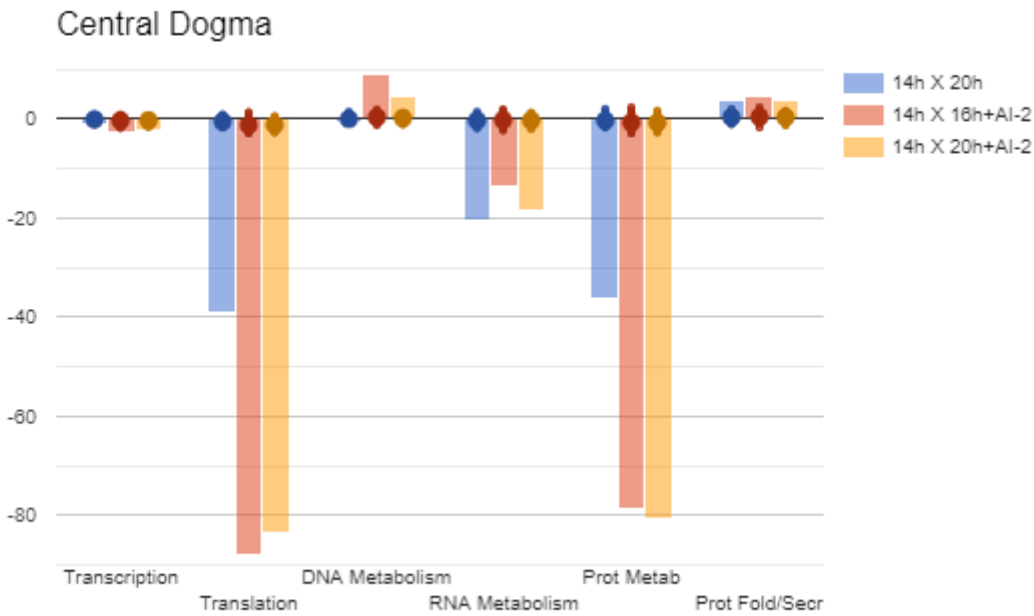

-1.5 0.0 1.5

14h X 20h  
14h X 16h+AI-2  
14h X 20h+AI-2

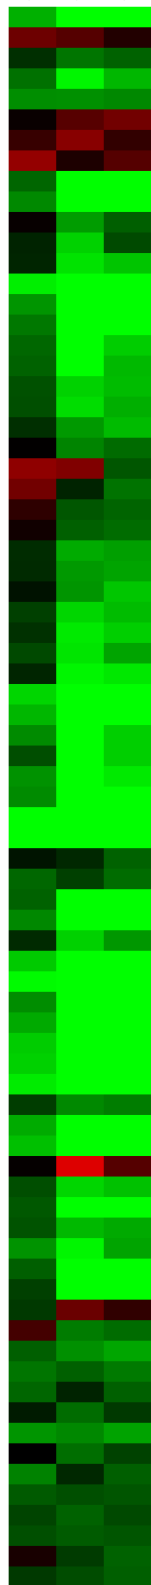

Transcription Proteins / DNA-directed RNA polymerase subunit alpha (ZMO\_RS02380)  
 Transcription Proteins / DNA-directed RNA polymerase subunit beta' (ZMO\_RS03270)  
 Transcription Proteins / DNA-directed RNA polymerase subunit omega (ZMO\_RS07745)  
 Transcription Proteins / transcription termination/antitermination factor NusG (ZMO\_RS03235)  
 Transcription Proteins / transcription termination factor Rho (ZMO\_RS09085)  
 Transcription Proteins / RNA polymerase sigma-54 factor (ZMO\_RS01195)  
 Transcription Proteins / RNA polymerase sigma factor RpoD (ZMO\_RS07275)  
 Transcription Proteins / RNA polymerase sigma factor RpoH (ZMO\_RS03350)  
 Translation Proteins / 30S ribosomal protein S20 (ZMO\_RS06075)  
 Translation Proteins / 30S ribosomal protein S4 (ZMO\_RS06110)  
 Translation Proteins / 30S ribosomal protein S2 (ZMO\_RS05180)  
 Translation Proteins / 50S ribosomal protein L28 (ZMO\_RS01270)  
 Translation Proteins / 50S ribosomal protein L27 (ZMO\_RS00905)  
 Translation Proteins / 50S ribosomal protein L21 (ZMO\_RS00910)  
 Translation Proteins / 50S ribosomal protein L33 (ZMO\_RS01075)  
 Translation Proteins / 30S ribosomal protein S7 (ZMO\_RS02240)  
 Translation Proteins / 50S ribosomal protein L3 (ZMO\_RS02260)  
 Translation Proteins / 50S ribosomal protein L4 (ZMO\_RS02265)  
 Translation Proteins / 50S ribosomal protein L23 (ZMO\_RS02270)  
 Translation Proteins / 50S ribosomal protein L2 (ZMO\_RS02275)  
 Translation Proteins / 50S ribosomal protein L22 (ZMO\_RS02285)  
 Translation Proteins / 30S ribosomal protein S3 (ZMO\_RS02290)  
 Translation Proteins / 50S ribosomal protein L29 (ZMO\_RS02300)  
 Translation Proteins / 30S ribosomal protein S17 (ZMO\_RS02305)  
 Translation Proteins / 50S ribosomal protein L14 (ZMO\_RS02310)  
 Translation Proteins / 50S ribosomal protein L24 (ZMO\_RS02315)  
 Translation Proteins / 50S ribosomal protein L5 (ZMO\_RS02320)  
 Translation Proteins / 30S ribosomal protein S14 (ZMO\_RS02325)  
 Translation Proteins / 30S ribosomal protein S8 (ZMO\_RS02330)  
 Translation Proteins / 50S ribosomal protein L6 (ZMO\_RS02335)  
 Translation Proteins / 50S ribosomal protein L18 (ZMO\_RS02340)  
 Translation Proteins / 30S ribosomal protein S5 (ZMO\_RS02345)  
 Translation Proteins / 50S ribosomal protein L15 (ZMO\_RS02355)  
 Translation Proteins / 30S ribosomal protein S13 (ZMO\_RS02370)  
 Translation Proteins / 30S ribosomal protein S11 (ZMO\_RS02375)  
 Translation Proteins / 50S ribosomal protein L17 (ZMO\_RS02385)  
 Translation Proteins / 30S ribosomal protein S15 (ZMO\_RS02435)  
 Translation Proteins / 50S ribosomal protein L11 (ZMO\_RS03240)  
 Translation Proteins / 50S ribosomal protein L1 (ZMO\_RS03245)  
 Translation Proteins / 50S ribosomal protein L10 (ZMO\_RS03250)  
 Translation Proteins / 50S ribosomal protein L7/L12 (ZMO\_RS03255)  
 Translation Proteins / Asp-tRNA(Asn)/Glu-tRNA(Gln) amidotransferase GatCAB subunit A (ZMO\_RS03490)  
 Translation Proteins / Asp-tRNA(Asn)/Glu-tRNA(Gln) amidotransferase subunit GatC (ZMO\_RS03495)  
 Translation Proteins / 30S ribosomal protein S9 (ZMO\_RS03945)  
 Translation Proteins / 50S ribosomal protein L13 (ZMO\_RS03950)  
 Translation Proteins / 30S ribosomal protein S16 (ZMO\_RS04810)  
 Translation Proteins / 50S ribosomal protein L19 (ZMO\_RS04825)  
 Translation Proteins / 50S ribosomal protein L31 (ZMO\_RS05125)  
 Translation Proteins / 30S ribosomal protein S6 (ZMO\_RS05505)  
 Translation Proteins / 30S ribosomal protein S18 (ZMO\_RS05510)  
 Translation Proteins / 50S ribosomal protein L9 (ZMO\_RS05515)  
 Translation Proteins / 50S ribosomal protein L36 (ZMO\_RS05585)  
 Translation Proteins / 50S ribosomal protein L20 (ZMO\_RS06800)  
 Translation Proteins / 30S ribosomal protein S21 (ZMO\_RS07710)  
 Translation Proteins / 30S ribosomal protein S1 (ZMO\_RS08090)  
 Translation Proteins / 50S ribosomal protein L25 (ZMO\_RS08670)  
 Translation Proteins / YbaK/EbsC family protein (ZMO\_RS08875)  
 Translation Proteins / 30S ribosomal protein S19 (ZMO\_RS02280)  
 Translation Proteins / 30S ribosomal protein S12 (ZMO\_RS02235)  
 Translation Proteins / elongation factor Ts (ZMO\_RS05175)  
 Translation Proteins / elongation factor P (ZMO\_RS01410)  
 Translation Proteins / elongation factor G (ZMO\_RS02245)  
 Translation Proteins / elongation factor Tu (ZMO\_RS02250)  
 Translation Proteins / transcription elongation factor GreB (ZMO\_RS03200)  
 Translation Proteins / SsrA-binding protein (ZMO\_RS03215)  
 Translation Proteins / leucine--tRNA ligase (ZMO\_RS06425)  
 Translation Proteins / glycine--tRNA ligase subunit beta (ZMO\_RS06470)  
 Translation Proteins / glycine--tRNA ligase subunit alpha (ZMO\_RS06475)  
 Translation Proteins / cysteine--tRNA ligase (ZMO\_RS00790)  
 Translation Proteins / proline--tRNA ligase (ZMO\_RS01985)  
 Translation Proteins / alanine--tRNA ligase (ZMO\_RS03775)  
 Translation Proteins / elongation factor 3 (ZMO\_RS00465)  
 Translation Proteins / valine--tRNA ligase (ZMO\_RS08510)  
 Translation Proteins / threonine--tRNA ligase (ZMO\_RS03415)  
 Translation Proteins / glutamate--tRNA ligase 1 (ZMO\_RS04015)  
 Translation Proteins / ribosome-recycling factor (ZMO\_RS05165)  
 Translation Proteins / peptide chain release factor 2 (ZMO\_RS00850)

|  |                                                                                                                              |
|--|------------------------------------------------------------------------------------------------------------------------------|
|  | Translation Proteins / translation initiation factor IF-1 (ZMO_RS04545)                                                      |
|  | Translation Proteins / translation initiation factor IF-3 (ZMO_RS08650)                                                      |
|  | DNA Metabolism / replication-associated recombination protein A (ZMO_RS00510)                                                |
|  | DNA Metabolism / molecular chaperone DnaJ (ZMO_RS02935)                                                                      |
|  | DNA Metabolism / DNA polymerase III subunit beta (ZMO_RS04390)                                                               |
|  | DNA Metabolism / ribonucleoside triphosphate reductase (ZMO_RS04595)                                                         |
|  | DNA Metabolism / ribonucleotide-diphosphate reductase subunit alpha (ZMO_RS04645)                                            |
|  | DNA Metabolism / DNA polymerase III subunit chi (ZMO_RS05860)                                                                |
|  | DNA Metabolism / DNA polymerase III subunit delta (ZMO_RS06415)                                                              |
|  | DNA Metabolism / single-stranded DNA-binding protein (ZMO_RS06900)                                                           |
|  | DNA Metabolism / DNA replication and repair protein RecF (ZMO_RS07115)                                                       |
|  | DNA Metabolism / DNA topoisomerase (ATP-hydrolyzing) subunit B (ZMO_RS07110)                                                 |
|  | DNA Metabolism / DNA primase (ZMO_RS07270)                                                                                   |
|  | DNA Metabolism / primosomal protein N' (ZMO_RS08725)                                                                         |
|  | DNA Metabolism / DNA recombination protein RmuC (ZMO_RS03630)                                                                |
|  | DNA Metabolism / crossover junction endodeoxyribonuclease RuvC (ZMO_RS00650)                                                 |
|  | DNA Metabolism / Holliday junction branch migration protein RuvA (ZMO_RS00655)                                               |
|  | DNA Metabolism / single-stranded-DNA-specific exonuclease RecJ (ZMO_RS05530)                                                 |
|  | DNA Metabolism / integration host factor subunit beta (ZMO_RS08100)                                                          |
|  | DNA Metabolism / DUF4102 domain-containing protein (ZMO_RS08765)                                                             |
|  | DNA Metabolism / DNA topoisomerase I (ZMO_RS05355)                                                                           |
|  | DNA Metabolism / DNA topoisomerase IV subunit B (ZMO_RS01770)                                                                |
|  | DNA Metabolism / exodeoxyribonuclease III (ZMO_RS06260)                                                                      |
|  | DNA Metabolism / methylated-DNA--[protein]-cysteine S-methyltransferase (ZMO_RS09070)                                        |
|  | DNA Metabolism / DNA-3-methyladenine glycosylase 2 family protein (ZMO_RS01620)                                              |
|  | DNA Metabolism / excinuclease ABC subunit B (ZMO_RS01550)                                                                    |
|  | DNA Metabolism / restriction endonuclease (ZMO_RS00135)                                                                      |
|  | DNA Metabolism / exodeoxyribonuclease 7 small subunit (ZMO_RS03825)                                                          |
|  | DNA Metabolism / TatD family deoxyribonuclease (ZMO_RS04890)                                                                 |
|  | RNA Metabolism / ribonuclease PH (ZMO_RS00070)                                                                               |
|  | RNA Metabolism / ribonuclease E/G (ZMO_RS00830)                                                                              |
|  | RNA Metabolism / ribosome maturation factor RimM (ZMO_RS04815)                                                               |
|  | RNA Metabolism / 16S rRNA (uracil(1498)-N(3))-methyltransferase (ZMO_RS06955)                                                |
|  | RNA Metabolism / ribosomal large subunit pseudouridine synthase D (ZMO_RS03355)                                              |
|  | RNA Metabolism / 16S rRNA (guanine(966)-N(2))-methyltransferase RsmD (ZMO_RS02565)                                           |
|  | RNA Metabolism / 23S rRNA (pseudouridine(1915)-N(3))-methyltransferase RlmH (ZMO_RS07480)                                    |
|  | RNA Metabolism / ribosomal RNA small subunit methyltransferase H (ZMO_RS03675)                                               |
|  | RNA Metabolism / FADH(2)-oxidizing methylenetetrahydrofolate--tRNA-(uracil(54)-C(5))- methyltransferase TrmFO (ZMO_RS03080)  |
|  | RNA Metabolism / rRNA methyltransferase (ZMO_RS05400)                                                                        |
|  | RNA Metabolism / tRNA (adenosine(37)-N6)-threonylcarbamoyltransferase complex dimerization subunit type 1 TsaB (ZMO_RS06330) |
|  | RNA Metabolism / tRNA (guanosine(37)-N1)-methyltransferase TrmD (ZMO_RS04820)                                                |
|  | RNA Metabolism / tRNA (guanosine(46)-N7)-methyltransferase TrmB (ZMO_RS00625)                                                |
|  | RNA Metabolism / tRNA pseudouridine(55) synthase TruB (ZMO_RS02440)                                                          |
|  | RNA Metabolism / ribonuclease D (ZMO_RS03185)                                                                                |
|  | RNA Metabolism / ribonuclease H (ZMO_RS07185)                                                                                |
|  | RNA Metabolism / polyribonucleotide nucleotidyltransferase (ZMO_RS02430)                                                     |
|  | RNA Metabolism / LysR family transcriptional regulator (ZMO_RS00210)                                                         |
|  | RNA Metabolism / YebC/PmpR family DNA-binding transcriptional regulator (ZMO_RS00645)                                        |
|  | RNA Metabolism / MerR family DNA-binding transcriptional regulator (ZMO_RS00875)                                             |
|  | RNA Metabolism / RNA chaperone Hfq (ZMO_RS01480)                                                                             |
|  | RNA Metabolism / DNA-binding response regulator (ZMO_RS02055)                                                                |
|  | RNA Metabolism / Lrp/AsnC family transcriptional regulator (ZMO_RS04950)                                                     |
|  | RNA Metabolism / AraC family transcriptional regulator (ZMO_RS06165)                                                         |
|  | RNA Metabolism / DNA-binding response regulator (ZMO_RS06195)                                                                |
|  | RNA Metabolism / transcriptional repressor (ZMO_RS06315)                                                                     |
|  | RNA Metabolism / MucR family transcriptional regulator (ZMO_RS06320)                                                         |
|  | RNA Metabolism / LysR family transcriptional regulator (ZMO_RS07805)                                                         |
|  | RNA Metabolism / methyltransferase domain-containing protein (ZMO_RS07860)                                                   |
|  | RNA Metabolism / LysR family transcriptional regulator (ZMO_RS08065)                                                         |
|  | RNA Metabolism / integration host factor subunit beta (ZMO_RS08100)                                                          |
|  | RNA Metabolism / PLP-dependent aminotransferase family protein (ZMO_RS08340)                                                 |
|  | RNA Metabolism / PLP-dependent aminotransferase family protein (ZMO_RS08855)                                                 |
|  | RNA Metabolism / glutamate uptake regulatory protein (ZMO_RS01970)                                                           |
|  | RNA Metabolism / phosphate regulon transcriptional regulatory protein PhoB (ZMO_RS05215)                                     |
|  | RNA Metabolism / LysR family transcriptional regulator (ZMO_RS05980)                                                         |
|  | RNA Metabolism / hypothetical protein (ZMO_RS08835)                                                                          |
|  | RNA Metabolism / RNA polymerase sigma factor RpoD (ZMO_RS07275)                                                              |
|  | RNA Metabolism / RNA polymerase sigma factor RpoH (ZMO_RS03350)                                                              |
|  | RNA Metabolism / RNA polymerase sigma-54 factor (ZMO_RS01195)                                                                |
|  | RNA Metabolism / HrcA family transcriptional regulator (ZMO_RS00075)                                                         |
|  | RNA Metabolism / transcriptional regulator NrdR (ZMO_RS05395)                                                                |
|  | RNA Metabolism / transcription elongation factor GreB (ZMO_RS03200)                                                          |
|  | RNA Metabolism / transcription elongation factor GreA (ZMO_RS07250)                                                          |
|  | RNA Metabolism / transcription termination/antitermination factor NusG (ZMO_RS03235)                                         |
|  | RNA Metabolism / elongation factor 3 (ZMO_RS00465)                                                                           |
|  | RNA Metabolism / cysteine--tRNA ligase (ZMO_RS00790)                                                                         |
|  | RNA Metabolism / 23S rRNA (guanosine(2251)-2'-O)-methyltransferase RlmB (ZMO_RS01000)                                        |
|  | RNA Metabolism / proline--tRNA ligase (ZMO_RS01985)                                                                          |
|  | RNA Metabolism / DNA-directed RNA polymerase subunit alpha (ZMO_RS02380)                                                     |
|  | RNA Metabolism / RNA-binding protein S4 (ZMO_RS02570)                                                                        |
|  | RNA Metabolism / DNA-directed RNA polymerase subunit beta' (ZMO_RS03270)                                                     |
|  | RNA Metabolism / threonine--tRNA ligase (ZMO_RS03415)                                                                        |
|  | RNA Metabolism / alanine--tRNA ligase (ZMO_RS03775)                                                                          |
|  | RNA Metabolism / glutamate--tRNA ligase 1 (ZMO_RS04015)                                                                      |
|  | RNA Metabolism / RNA methyltransferase (ZMO_RS05955)                                                                         |
|  | RNA Metabolism / leucine--tRNA ligase (ZMO_RS06425)                                                                          |
|  | RNA Metabolism / glycine--tRNA ligase subunit beta (ZMO_RS06470)                                                             |

|  |                                                                                                                                  |
|--|----------------------------------------------------------------------------------------------------------------------------------|
|  | RNA Metabolism / glycine--tRNA ligase subunit alpha (ZMO_RS06475)                                                                |
|  | RNA Metabolism / DNA primase (ZMO_RS07270)                                                                                       |
|  | RNA Metabolism / DNA-directed RNA polymerase subunit omega (ZMO_RS07745)                                                         |
|  | RNA Metabolism / valine--tRNA ligase (ZMO_RS08510)                                                                               |
|  | RNA Metabolism / primosomal protein N' (ZMO_RS08725)                                                                             |
|  | RNA Metabolism / YbaK/EbsC family protein (ZMO_RS08875)                                                                          |
|  | RNA Metabolism / transcription termination factor Rho (ZMO_RS09085)                                                              |
|  | Protein Metabolism / low molecular weight phosphotyrosine protein phosphatase (ZMO_RS00590)                                      |
|  | Protein Metabolism / cytochrome c-type biogenesis protein CcmE (ZMO_RS05630)                                                     |
|  | Protein Metabolism / hypothetical protein (ZMO_RS08030)                                                                          |
|  | Protein Metabolism / homoserine kinase (ZMO_RS06170)                                                                             |
|  | Protein Metabolism / two-component sensor histidine kinase (ZMO_RS04935)                                                         |
|  | Protein Metabolism / FAD:protein FMN transferase (ZMO_RS08290)                                                                   |
|  | Protein Metabolism / peptidyl-prolyl cis-trans isomerase (ZMO_RS02005)                                                           |
|  | Protein Metabolism / peptidylprolyl isomerase (ZMO_RS03445)                                                                      |
|  | Protein Metabolism / trigger factor (ZMO_RS04240)                                                                                |
|  | Protein Metabolism / FKBP-type peptidyl-prolyl cis-trans isomerase (ZMO_RS07705)                                                 |
|  | Protein Metabolism / deoxyhypusine synthase (ZMO_RS04570)                                                                        |
|  | Protein Metabolism / glutamine cyclotransferase (ZMO_RS08505)                                                                    |
|  | Protein Metabolism / iron-sulfur cluster assembly accessory protein (ZMO_RS06265)                                                |
|  | Protein Metabolism / signal peptide peptidase SppA (ZMO_RS08750)                                                                 |
|  | Protein Metabolism / PDZ domain-containing protein (ZMO_RS01015)                                                                 |
|  | Protein Metabolism / ATP-dependent protease ATPase subunit HslU (ZMO_RS01070)                                                    |
|  | Protein Metabolism / penicillin-binding protein 2 (ZMO_RS01535)                                                                  |
|  | Protein Metabolism / ATP-dependent Clp protease ATP-binding subunit ClpA (ZMO_RS01740)                                           |
|  | Protein Metabolism / M13 family peptidase (ZMO_RS03220)                                                                          |
|  | Protein Metabolism / leucyl aminopeptidase family protein (ZMO_RS03595)                                                          |
|  | Protein Metabolism / ATP-dependent Clp protease proteolytic subunit (ZMO_RS04250)                                                |
|  | Protein Metabolism / RIP metalloprotease RseP (ZMO_RS05145)                                                                      |
|  | Protein Metabolism / leucyl aminopeptidase (ZMO_RS05865)                                                                         |
|  | Protein Metabolism / tRNA (adenosine(37)-N6)-threonylcarbamoyltransferase complex dimerization subunit type 1 TsaB (ZMO_RS06330) |
|  | Protein Metabolism / autotransporter domain-containing protein (ZMO_RS06635)                                                     |
|  | Protein Metabolism / rhomboid family intramembrane serine protease (ZMO_RS07245)                                                 |
|  | Protein Metabolism / succinyl-diaminopimelate desuccinylase (ZMO_RS07320)                                                        |
|  | Protein Metabolism / S41 family peptidase (ZMO_RS07490)                                                                          |
|  | Protein Metabolism / peptidase S16 (ZMO_RS07670)                                                                                 |
|  | Protein Metabolism / DNA repair protein RadC (ZMO_RS08780)                                                                       |
|  | Protein Metabolism / HslU--HslV peptidase proteolytic subunit (ZMO_RS01065)                                                      |
|  | Protein Metabolism / endopeptidase La (ZMO_RS01615)                                                                              |
|  | Protein Metabolism / ribosomal subunit interface protein (ZMO_RS00175)                                                           |
|  | Protein Metabolism / 50S ribosomal protein L1 (ZMO_RS03245)                                                                      |
|  | Protein Metabolism / integration host factor subunit beta (ZMO_RS08100)                                                          |
|  | Protein Metabolism / ribosome silencing factor RsfS (ZMO_RS07475)                                                                |
|  | Protein Metabolism / energy-dependent translational throttle protein EttA (ZMO_RS00780)                                          |
|  | Protein Metabolism / elongation factor 3 (ZMO_RS00465)                                                                           |
|  | Protein Metabolism / cysteine--tRNA ligase (ZMO_RS00790)                                                                         |
|  | Protein Metabolism / peptide chain release factor 2 (ZMO_RS00850)                                                                |
|  | Protein Metabolism / 50S ribosomal protein L27 (ZMO_RS00905)                                                                     |
|  | Protein Metabolism / 50S ribosomal protein L21 (ZMO_RS00910)                                                                     |
|  | Protein Metabolism / 50S ribosomal protein L33 (ZMO_RS01075)                                                                     |
|  | Protein Metabolism / 50S ribosomal protein L28 (ZMO_RS01270)                                                                     |
|  | Protein Metabolism / elongation factor P (ZMO_RS01410)                                                                           |
|  | Protein Metabolism / proline--tRNA ligase (ZMO_RS01985)                                                                          |
|  | Protein Metabolism / 30S ribosomal protein S12 (ZMO_RS02235)                                                                     |
|  | Protein Metabolism / 30S ribosomal protein S7 (ZMO_RS02240)                                                                      |
|  | Protein Metabolism / elongation factor G (ZMO_RS02245)                                                                           |
|  | Protein Metabolism / elongation factor Tu (ZMO_RS02250)                                                                          |
|  | Protein Metabolism / 50S ribosomal protein L3 (ZMO_RS02260)                                                                      |
|  | Protein Metabolism / 50S ribosomal protein L4 (ZMO_RS02265)                                                                      |
|  | Protein Metabolism / 50S ribosomal protein L23 (ZMO_RS02270)                                                                     |
|  | Protein Metabolism / 50S ribosomal protein L2 (ZMO_RS02275)                                                                      |
|  | Protein Metabolism / 30S ribosomal protein S19 (ZMO_RS02280)                                                                     |
|  | Protein Metabolism / 50S ribosomal protein L22 (ZMO_RS02285)                                                                     |
|  | Protein Metabolism / 30S ribosomal protein S3 (ZMO_RS02290)                                                                      |
|  | Protein Metabolism / 50S ribosomal protein L29 (ZMO_RS02300)                                                                     |
|  | Protein Metabolism / 30S ribosomal protein S17 (ZMO_RS02305)                                                                     |
|  | Protein Metabolism / 50S ribosomal protein L14 (ZMO_RS02310)                                                                     |
|  | Protein Metabolism / 50S ribosomal protein L24 (ZMO_RS02315)                                                                     |
|  | Protein Metabolism / 50S ribosomal protein L5 (ZMO_RS02320)                                                                      |
|  | Protein Metabolism / 30S ribosomal protein S14 (ZMO_RS02325)                                                                     |
|  | Protein Metabolism / 30S ribosomal protein S8 (ZMO_RS02330)                                                                      |
|  | Protein Metabolism / 50S ribosomal protein L6 (ZMO_RS02335)                                                                      |
|  | Protein Metabolism / 50S ribosomal protein L18 (ZMO_RS02340)                                                                     |
|  | Protein Metabolism / 30S ribosomal protein S5 (ZMO_RS02345)                                                                      |
|  | Protein Metabolism / 50S ribosomal protein L15 (ZMO_RS02355)                                                                     |
|  | Protein Metabolism / 30S ribosomal protein S13 (ZMO_RS02370)                                                                     |
|  | Protein Metabolism / 30S ribosomal protein S11 (ZMO_RS02375)                                                                     |
|  | Protein Metabolism / 50S ribosomal protein L17 (ZMO_RS02385)                                                                     |
|  | Protein Metabolism / 30S ribosomal protein S15 (ZMO_RS02435)                                                                     |
|  | Protein Metabolism / transcription elongation factor GreB (ZMO_RS03200)                                                          |
|  | Protein Metabolism / SsrA-binding protein (ZMO_RS03215)                                                                          |
|  | Protein Metabolism / 50S ribosomal protein L11 (ZMO_RS03240)                                                                     |
|  | Protein Metabolism / 50S ribosomal protein L10 (ZMO_RS03250)                                                                     |
|  | Protein Metabolism / 50S ribosomal protein L7/L12 (ZMO_RS03255)                                                                  |
|  | Protein Metabolism / threonine--tRNA ligase (ZMO_RS03415)                                                                        |
|  | Protein Metabolism / Asp-tRNA(Asn)/Glu-tRNA(Gln) amidotransferase GatCAB subunit A (ZMO_RS03490)                                 |

|  |                                                                                                   |
|--|---------------------------------------------------------------------------------------------------|
|  | Protein Metabolism / Asp-tRNA(Asn)/Glu-tRNA(Gln) amidotransferase subunit GatC (ZMO_RS03495)      |
|  | Protein Metabolism / alanine--tRNA ligase (ZMO_RS03775)                                           |
|  | Protein Metabolism / 30S ribosomal protein S9 (ZMO_RS03945)                                       |
|  | Protein Metabolism / 50S ribosomal protein L13 (ZMO_RS03950)                                      |
|  | Protein Metabolism / glutamate--tRNA ligase 1 (ZMO_RS04015)                                       |
|  | Protein Metabolism / leucyl/phenylalanyl-tRNA--protein transferase (ZMO_RS04150)                  |
|  | Protein Metabolism / translation initiation factor IF-1 (ZMO_RS04545)                             |
|  | Protein Metabolism / 30S ribosomal protein S16 (ZMO_RS04810)                                      |
|  | Protein Metabolism / 50S ribosomal protein L19 (ZMO_RS04825)                                      |
|  | Protein Metabolism / 50S ribosomal protein L31 (ZMO_RS05125)                                      |
|  | Protein Metabolism / ribosome-recycling factor (ZMO_RS05165)                                      |
|  | Protein Metabolism / elongation factor Ts (ZMO_RS05175)                                           |
|  | Protein Metabolism / 30S ribosomal protein S2 (ZMO_RS05180)                                       |
|  | Protein Metabolism / 30S ribosomal protein S6 (ZMO_RS05505)                                       |
|  | Protein Metabolism / 30S ribosomal protein S18 (ZMO_RS05510)                                      |
|  | Protein Metabolism / 50S ribosomal protein L9 (ZMO_RS05515)                                       |
|  | Protein Metabolism / 50S ribosomal protein L36 (ZMO_RS05585)                                      |
|  | Protein Metabolism / 30S ribosomal protein S20 (ZMO_RS06075)                                      |
|  | Protein Metabolism / 30S ribosomal protein S4 (ZMO_RS06110)                                       |
|  | Protein Metabolism / ATP-dependent chaperone ClpB (ZMO_RS06375)                                   |
|  | Protein Metabolism / leucine--tRNA ligase (ZMO_RS06425)                                           |
|  | Protein Metabolism / glycine--tRNA ligase subunit beta (ZMO_RS06470)                              |
|  | Protein Metabolism / glycine--tRNA ligase subunit alpha (ZMO_RS06475)                             |
|  | Protein Metabolism / 50S ribosomal protein L20 (ZMO_RS06800)                                      |
|  | Protein Metabolism / 30S ribosomal protein S21 (ZMO_RS07710)                                      |
|  | Protein Metabolism / 30S ribosomal protein S1 (ZMO_RS08090)                                       |
|  | Protein Metabolism / valine--tRNA ligase (ZMO_RS08510)                                            |
|  | Protein Metabolism / translation initiation factor IF-3 (ZMO_RS08650)                             |
|  | Protein Metabolism / 50S ribosomal protein L25 (ZMO_RS08670)                                      |
|  | Protein Metabolism / YbaK/EbsC family protein (ZMO_RS08875)                                       |
|  | Protein Folding and Secretion / molecular chaperone DnaK (ZMO_RS02930)                            |
|  | Protein Folding and Secretion / molecular chaperone DnaJ (ZMO_RS02935)                            |
|  | Protein Folding and Secretion / trigger factor (ZMO_RS04240)                                      |
|  | Protein Folding and Secretion / ATP-dependent Clp protease ATP-binding subunit ClpX (ZMO_RS04255) |
|  | Protein Folding and Secretion / molecular chaperone DnaJ (ZMO_RS07600)                            |
|  | Protein Folding and Secretion / FKBP-type peptidyl-prolyl cis-trans isomerase (ZMO_RS07705)       |
|  | Protein Folding and Secretion / ATP-dependent chaperone ClpB (ZMO_RS06375)                        |
|  | Protein Folding and Secretion / ATP-dependent Clp protease ATP-binding subunit ClpA (ZMO_RS01740) |
|  | Protein Folding and Secretion / secretion protein HlyD (ZMO_RS01105)                              |
|  | Protein Folding and Secretion / preprotein translocase subunit SecG (ZMO_RS01995)                 |
|  | Protein Folding and Secretion / preprotein translocase subunit SecE (ZMO_RS03230)                 |

Supplementary Material S3B – Biosynthesis of biomolecules

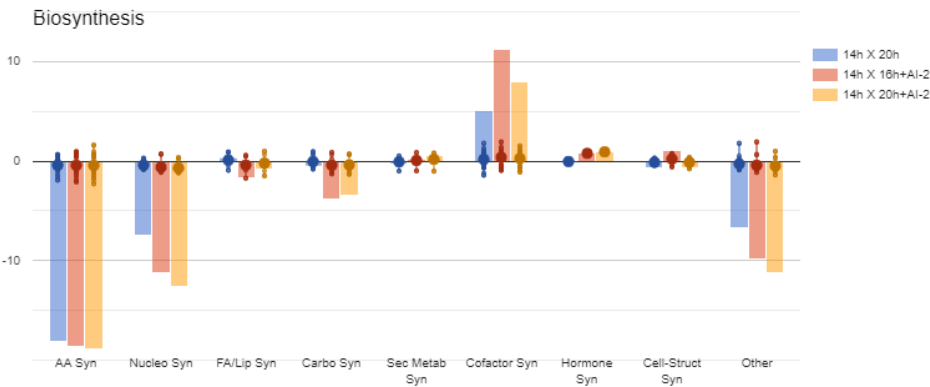



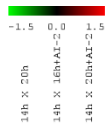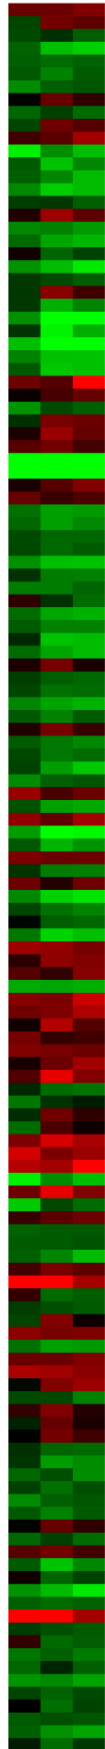

|                                             |   |                                                                                                              |
|---------------------------------------------|---|--------------------------------------------------------------------------------------------------------------|
| Amino Acid Biosynthesis                     | / | cysteine desulfurase (ZMO_RS01840)                                                                           |
| Amino Acid Biosynthesis                     | / | cysteine desulfurase Nifs (ZMO_RS08255)                                                                      |
| Amino Acid Biosynthesis                     | / | alanine racemase (ZMO_RS07150)                                                                               |
| Amino Acid Biosynthesis                     | / | argininosuccinate synthase (ZMO_RS04635)                                                                     |
| Amino Acid Biosynthesis                     | / | acetylglutamate kinase (ZMO_RS06695)                                                                         |
| Amino Acid Biosynthesis                     | / | carbamoyl-phosphate synthase small subunit (ZMO_RS07260)                                                     |
| Amino Acid Biosynthesis                     | / | CTP synthetase (ZMO_RS01990)                                                                                 |
| Amino Acid Biosynthesis                     | / | imidazole glycerol phosphate synthase cyclase subunit (ZMO_RS06725)                                          |
| Amino Acid Biosynthesis                     | / | Asp-tRNA(Asn)/Glu-tRNA(Gln) amidotransferase subunit GatC (ZMO_RS03495)                                      |
| Amino Acid Biosynthesis                     | / | aspartate amidotransferase (ZMO_RS00010)                                                                     |
| Amino Acid Biosynthesis                     | / | serine acetyltransferase (ZMO_RS07795)                                                                       |
| Amino Acid Biosynthesis                     | / | S-adenosylmethionine synthase (ZMO_RS01190)                                                                  |
| Amino Acid Biosynthesis                     | / | aminotransferase class V-fold PLP-dependent enzyme (ZMO_RS03010)                                             |
| Amino Acid Biosynthesis                     | / | serine hydroxymethyltransferase (ZMO_RS05390)                                                                |
| Amino Acid Biosynthesis                     | / | histidinol phosphate phosphatase (ZMO_RS06805)                                                               |
| Amino Acid Biosynthesis                     | / | imidazoleglycerol-phosphate dehydratase HisB (ZMO_RS06740)                                                   |
| Amino Acid Biosynthesis                     | / | 1-(5-phosphoribosyl)-5-((5-phosphoribosylamino)methylideneamino)imidazole-4- carboxamide (ZMO_RS06730)       |
| Amino Acid Biosynthesis                     | / | phosphoribosyl-ATP pyrophosphatase (ZMO_RS06720)                                                             |
| Amino Acid Biosynthesis                     | / | ATP phosphoribosyltransferase regulatory subunit (ZMO_RS07580)                                               |
| Amino Acid Biosynthesis                     | / | 2-isopropylmalate synthase (ZMO_RS06290)                                                                     |
| Amino Acid Biosynthesis                     | / | aspartate-semialdehyde dehydrogenase (ZMO_RS06290)                                                           |
| Amino Acid Biosynthesis                     | / | homoserine dehydrogenase (ZMO_RS02080)                                                                       |
| Amino Acid Biosynthesis                     | / | homoserine kinase (ZMO_RS07180)                                                                              |
| Amino Acid Biosynthesis                     | / | homoserine kinase (ZMO_RS06170)                                                                              |
| Amino Acid Biosynthesis                     | / | threonine synthase (ZMO_RS08575)                                                                             |
| Amino Acid Biosynthesis                     | / | ketol-acid reductoisomerase (ZMO_RS05105)                                                                    |
| Amino Acid Biosynthesis                     | / | acetylacetyl synthase, large subunit, biosynthetic type (ZMO_RS05095)                                        |
| Amino Acid Biosynthesis                     | / | acetylacetyl synthase small subunit (ZMO_RS05100)                                                            |
| Amino Acid Biosynthesis                     | / | acetylacetyl synthase large subunit (ZMO_RS03060)                                                            |
| Amino Acid Biosynthesis                     | / | 3-isopropylmalate dehydrogenase (ZMO_RS03015)                                                                |
| Amino Acid Biosynthesis                     | / | 3-isopropylmalate synthase (ZMO_RS04330)                                                                     |
| Amino Acid Biosynthesis                     | / | 3-isopropylmalate dehydratase Large subunit (ZMO_RS00435)                                                    |
| Amino Acid Biosynthesis                     | / | succinyl-diaminopimelate desuccinylase (ZMO_RS07320)                                                         |
| Amino Acid Biosynthesis                     | / | sulfate adenylyltransferase subunit CysN (ZMO_RS00020)                                                       |
| Amino Acid Biosynthesis                     | / | adenylyl-sulfate kinase (ZMO_RS00015)                                                                        |
| Amino Acid Biosynthesis                     | / | homoserine O-acetyltransferase (ZMO_RS00965)                                                                 |
| Amino Acid Biosynthesis                     | / | 5-methyltetrahydropteroylglutamate-- homocysteine S-methyltransferase (ZMO_RS04470)                          |
| Amino Acid Biosynthesis                     | / | chorismate mutase (ZMO_RS02500)                                                                              |
| Amino Acid Biosynthesis                     | / | pyrroline-5-carboxylate reductase (ZMO_RS01335)                                                              |
| Amino Acid Biosynthesis                     | / | glutamate 5-kinase (ZMO_RS00890)                                                                             |
| Amino Acid Biosynthesis                     | / | phosphoserine transaminase (ZMO_RS07570)                                                                     |
| Amino Acid Biosynthesis                     | / | N-(5'-phosphoribosyl)anthranilate isomerase (ZMO_RS02605)                                                    |
| Amino Acid Biosynthesis                     | / | tryptophan synthase subunit alpha (ZMO_RS02595)                                                              |
| Amino Acid Biosynthesis                     | / | tryptophan synthase subunit beta (ZMO_RS02600)                                                               |
| Nucleoside and Nucleotide Biosynthesis      | / | adenosine kinase (ZMO_RS08590)                                                                               |
| Nucleoside and Nucleotide Biosynthesis      | / | IMP dehydrogenase (ZMO_RS05620)                                                                              |
| Nucleoside and Nucleotide Biosynthesis      | / | guanylate kinase (ZMO_RS01870)                                                                               |
| Nucleoside and Nucleotide Biosynthesis      | / | amidophosphoribosyltransferase (ZMO_RS06965)                                                                 |
| Nucleoside and Nucleotide Biosynthesis      | / | adenylosuccinate synthetase (ZMO_RS07585)                                                                    |
| Nucleoside and Nucleotide Biosynthesis      | / | adenylylate kinase (ZMO_RS02365)                                                                             |
| Nucleoside and Nucleotide Biosynthesis      | / | phosphoribosylaminoimidazolecarboxamide synthase (ZMO_RS04710)                                               |
| Nucleoside and Nucleotide Biosynthesis      | / | adenylosuccinate lyase (ZMO_RS02940)                                                                         |
| Nucleoside and Nucleotide Biosynthesis      | / | bifunctional phosphoribosylaminoimidazolecarboxamide formyltransferase/IMP cyclohydrolase PurH (ZMO_RS00130) |
| Nucleoside and Nucleotide Biosynthesis      | / | 5-(carboxyamino)imidazole ribonucleotide mutase (ZMO_RS06355)                                                |
| Nucleoside and Nucleotide Biosynthesis      | / | 5-(carboxyamino)imidazole ribonucleotide synthase (ZMO_RS06360)                                              |
| Nucleoside and Nucleotide Biosynthesis      | / | ribonucleotide-diphosphate reductase subunit alpha (ZMO_RS04645)                                             |
| Nucleoside and Nucleotide Biosynthesis      | / | carbamoyl-phosphate synthase small subunit (ZMO_RS07260)                                                     |
| Nucleoside and Nucleotide Biosynthesis      | / | dihydroorotase (ZMO_RS07595)                                                                                 |
| Nucleoside and Nucleotide Biosynthesis      | / | orotidine-5'-phosphate decarboxylase (ZMO_RS02610)                                                           |
| Nucleoside and Nucleotide Biosynthesis      | / | (d)CMP kinase (ZMO_RS08085)                                                                                  |
| Nucleoside and Nucleotide Biosynthesis      | / | UMP kinase (ZMO_RS05170)                                                                                     |
| Nucleoside and Nucleotide Biosynthesis      | / | CTP synthetase (ZMO_RS01990)                                                                                 |
| Fatty Acid and Lipid Biosynthesis           | / | class I SAM-dependent methyltransferase (ZMO_RS04625)                                                        |
| Fatty Acid and Lipid Biosynthesis           | / | beta-ketoacyl-(acyl-carrier-protein) synthase II (ZMO_RS05725)                                               |
| Fatty Acid and Lipid Biosynthesis           | / | 3-oxoacyl-ACP reductase FabG (ZMO_RS05495)                                                                   |
| Fatty Acid and Lipid Biosynthesis           | / | beta-hydroxyacyl-ACP dehydratase (ZMO_RS05130)                                                               |
| Carbohydrate Biosynthesis                   | / | fructose-bisphosphate class II (ZMO_RS02075)                                                                 |
| Carbohydrate Biosynthesis                   | / | fructose-bisphosphate aldolase (ZMO_RS00765)                                                                 |
| Carbohydrate Biosynthesis                   | / | IMP dehydrogenase (ZMO_RS05920)                                                                              |
| Carbohydrate Biosynthesis                   | / | glucose-6-phosphate isomerase (ZMO_RS05445)                                                                  |
| Carbohydrate Biosynthesis                   | / | glucose-phosphate pyrophosphokinase (ZMO_RS06810)                                                            |
| Carbohydrate Biosynthesis                   | / | 3-deoxy-8-phosphooctulonate synthase (ZMO_RS06665)                                                           |
| Carbohydrate Biosynthesis                   | / | mannose-1-phosphate guanylyltransferase/mannose-6-phosphate isomerase (ZMO_RS05545)                          |
| Carbohydrate Biosynthesis                   | / | UTP--glucose-1-phosphate uridylyltransferase (ZMO_RS07950)                                                   |
| Carbohydrate Biosynthesis                   | / | UDP-glucose/GDP-mannose dehydrogenase family protein (ZMO_RS03650)                                           |
| Secondary Metabolite Biosynthesis           | / | SMP-30/gluconolactonase/LRE family protein (ZMO_RS09050)                                                     |
| Secondary Metabolite Biosynthesis           | / | gluconate kinase (ZMO_RS07950)                                                                               |
| Secondary Metabolite Biosynthesis           | / | inositol monophosphatase (ZMO_RS01415)                                                                       |
| Cofactor, Carrier, and Vitamin Biosynthesis | / | pantoate--beta-alanine ligase (ZMO_RS09000)                                                                  |
| Cofactor, Carrier, and Vitamin Biosynthesis | / | 3-methyl-2-oxobutanoate hydroxymethyltransferase (ZMO_RS08995)                                               |
| Cofactor, Carrier, and Vitamin Biosynthesis | / | 3-methyl-2-oxobutanoate hydroxymethyltransferase (ZMO_RS08905)                                               |
| Cofactor, Carrier, and Vitamin Biosynthesis | / | 6,7-dimethyl-8-ribitylmazine synthase (ZMO_RS02030)                                                          |
| Cofactor, Carrier, and Vitamin Biosynthesis | / | 3,4-dihydroxy-2-butanone-4-phosphate synthase (ZMO_RS02035)                                                  |
| Cofactor, Carrier, and Vitamin Biosynthesis | / | glutathione-disulfide reductase (ZMO_RS05440)                                                                |
| Cofactor, Carrier, and Vitamin Biosynthesis | / | demethylmenaquinone methyltransferase (ZMO_RS08900)                                                          |
| Cofactor, Carrier, and Vitamin Biosynthesis | / | thioredoxin-disulfide reductase (ZMO_RS05110)                                                                |
| Cofactor, Carrier, and Vitamin Biosynthesis | / | signal peptide peptidase SppA (ZMO_RS08750)                                                                  |
| Cofactor, Carrier, and Vitamin Biosynthesis | / | low molecular weight phosphotyrosine protein phosphatase (ZMO_RS00590)                                       |
| Cofactor, Carrier, and Vitamin Biosynthesis | / | acid phosphatase (ZMO_RS00545)                                                                               |
| Cofactor, Carrier, and Vitamin Biosynthesis | / | L-aspartate oxidase (ZMO_RS00610)                                                                            |
| Cofactor, Carrier, and Vitamin Biosynthesis | / | glutaredoxin 3 (ZMO_RS03370)                                                                                 |
| Cofactor, Carrier, and Vitamin Biosynthesis | / | glutaredoxin 2 (ZMO_RS00290)                                                                                 |
| Cofactor, Carrier, and Vitamin Biosynthesis | / | S-adenosylmethionine synthase (ZMO_RS01190)                                                                  |
| Cofactor, Carrier, and Vitamin Biosynthesis | / | 5-formyltetrahydrofolate cyclo-ligase (ZMO_RS00925)                                                          |
| Cofactor, Carrier, and Vitamin Biosynthesis | / | methylene tetrahydrofolate reductase [NAD(P)H] (ZMO_RS07855)                                                 |
| Cofactor, Carrier, and Vitamin Biosynthesis | / | type I glutamine amidotransferase (ZMO_RS08965)                                                              |
| Cofactor, Carrier, and Vitamin Biosynthesis | / | bifunctional folylpolyglutamate synthase/dihydrofolate synthase (ZMO_RS02585)                                |
| Cofactor, Carrier, and Vitamin Biosynthesis | / | formate--tetrahydrofolate ligase (ZMO_RS01960)                                                               |
| Cofactor, Carrier, and Vitamin Biosynthesis | / | serine hydroxymethyltransferase (ZMO_RS05390)                                                                |
| Cofactor, Carrier, and Vitamin Biosynthesis | / | cobaltochelate subunit CobT (ZMO_RS06905)                                                                    |
| Cofactor, Carrier, and Vitamin Biosynthesis | / | uroporphyrinogen-III C-methyltransferase (ZMO_RS05690)                                                       |
| Cofactor, Carrier, and Vitamin Biosynthesis | / | 5-aminolevulinate synthase (ZMO_RS05380)                                                                     |
| Cofactor, Carrier, and Vitamin Biosynthesis | / | porphobilinogen synthase (ZMO_RS08515)                                                                       |
| Cofactor, Carrier, and Vitamin Biosynthesis | / | radical SAM protein (ZMO_RS00060)                                                                            |
| Cofactor, Carrier, and Vitamin Biosynthesis | / | pyridoxine 5'-phosphate synthase (ZMO_RS07685)                                                               |
| Cofactor, Carrier, and Vitamin Biosynthesis | / | phosphoserine transaminase (ZMO_RS07570)                                                                     |
| Cofactor, Carrier, and Vitamin Biosynthesis | / | cysteine desulfurase (ZMO_RS01840)                                                                           |
| Cofactor, Carrier, and Vitamin Biosynthesis | / | molecular chaperone DnaK (ZMO_RS02930)                                                                       |
| Hormone Biosynthesis                        | / | nitrilase (ZMO_RS05415)                                                                                      |
| Cell Structure Biosynthesis                 | / | penicillin-binding protein 2 (ZMO_RS03685)                                                                   |
| Cell Structure Biosynthesis                 | / | penicillin-binding protein 2 (ZMO_RS01535)                                                                   |
| Cell Structure Biosynthesis                 | / | monofunctional biosynthetic peptidoglycan transglycosylase (ZMO_RS04290)                                     |
| Cell Structure Biosynthesis                 | / | phospho-N-acetylmuramoyl-pentapeptide- transferase (ZMO_RS03700)                                             |
| Cell Structure Biosynthesis                 | / | UDP-N-acetylmuramoyl-L-alanyl-D-glutamate--2, 6-diaminopimelate ligase (ZMO_RS03690)                         |
| Other Biosynthesis                          | / | 3-deoxy-7-phosphoheptulonate synthase (ZMO_RS00795)                                                          |
| Other Biosynthesis                          | / | shikimate kinase (ZMO_RS02645)                                                                               |
| Other Biosynthesis                          | / | type II 3-dehydroquinate dehydratase (ZMO_RS03295)                                                           |
| Other Biosynthesis                          | / | CTP synthetase (ZMO_RS01990)                                                                                 |
| Other Biosynthesis                          | / | carbamoyl-phosphate synthase small subunit (ZMO_RS07260)                                                     |
| Other Biosynthesis                          | / | imidazole glycerol phosphate synthase cyclase subunit (ZMO_RS06725)                                          |
| Other Biosynthesis                          | / | Asp-tRNA(Asn)/Glu-tRNA(Gln) amidotransferase subunit GatC (ZMO_RS03495)                                      |
| Other Biosynthesis                          | / | homoserine O-acetyltransferase (ZMO_RS00965)                                                                 |
| Other Biosynthesis                          | / | aminotransferase class V-fold PLP-dependent enzyme (ZMO_RS03010)                                             |
| Other Biosynthesis                          | / | aspartate-semialdehyde dehydrogenase (ZMO_RS06290)                                                           |
| Other Biosynthesis                          | / | homoserine dehydrogenase (ZMO_RS02080)                                                                       |
| Other Biosynthesis                          | / | acetylglutamate kinase (ZMO_RS06695)                                                                         |
| Other Biosynthesis                          | / | uroporphyrinogen-III C-methyltransferase (ZMO_RS05690)                                                       |
| Other Biosynthesis                          | / | porphobilinogen synthase (ZMO_RS08515)                                                                       |
| Other Biosynthesis                          | / | 5-aminolevulinate synthase (ZMO_RS05380)                                                                     |
| Other Biosynthesis                          | / | glycine--tRNA ligase subunit beta (ZMO_RS06470)                                                              |
| Other Biosynthesis                          | / | glycine--tRNA ligase subunit alpha (ZMO_RS06475)                                                             |
| Other Biosynthesis                          | / | proline--tRNA ligase (ZMO_RS01955)                                                                           |
| Other Biosynthesis                          | / | threonine--tRNA ligase (ZMO_RS03415)                                                                         |
| Other Biosynthesis                          | / | alanine--tRNA ligase (ZMO_RS03775)                                                                           |
| Other Biosynthesis                          | / | valine--tRNA ligase (ZMO_RS08510)                                                                            |
| Other Biosynthesis                          | / | leucine--tRNA ligase (ZMO_RS06425)                                                                           |
| Other Biosynthesis                          | / | cysteine--tRNA ligase (ZMO_RS00790)                                                                          |



Supplementary Material S3C – Degradation of biomolecules

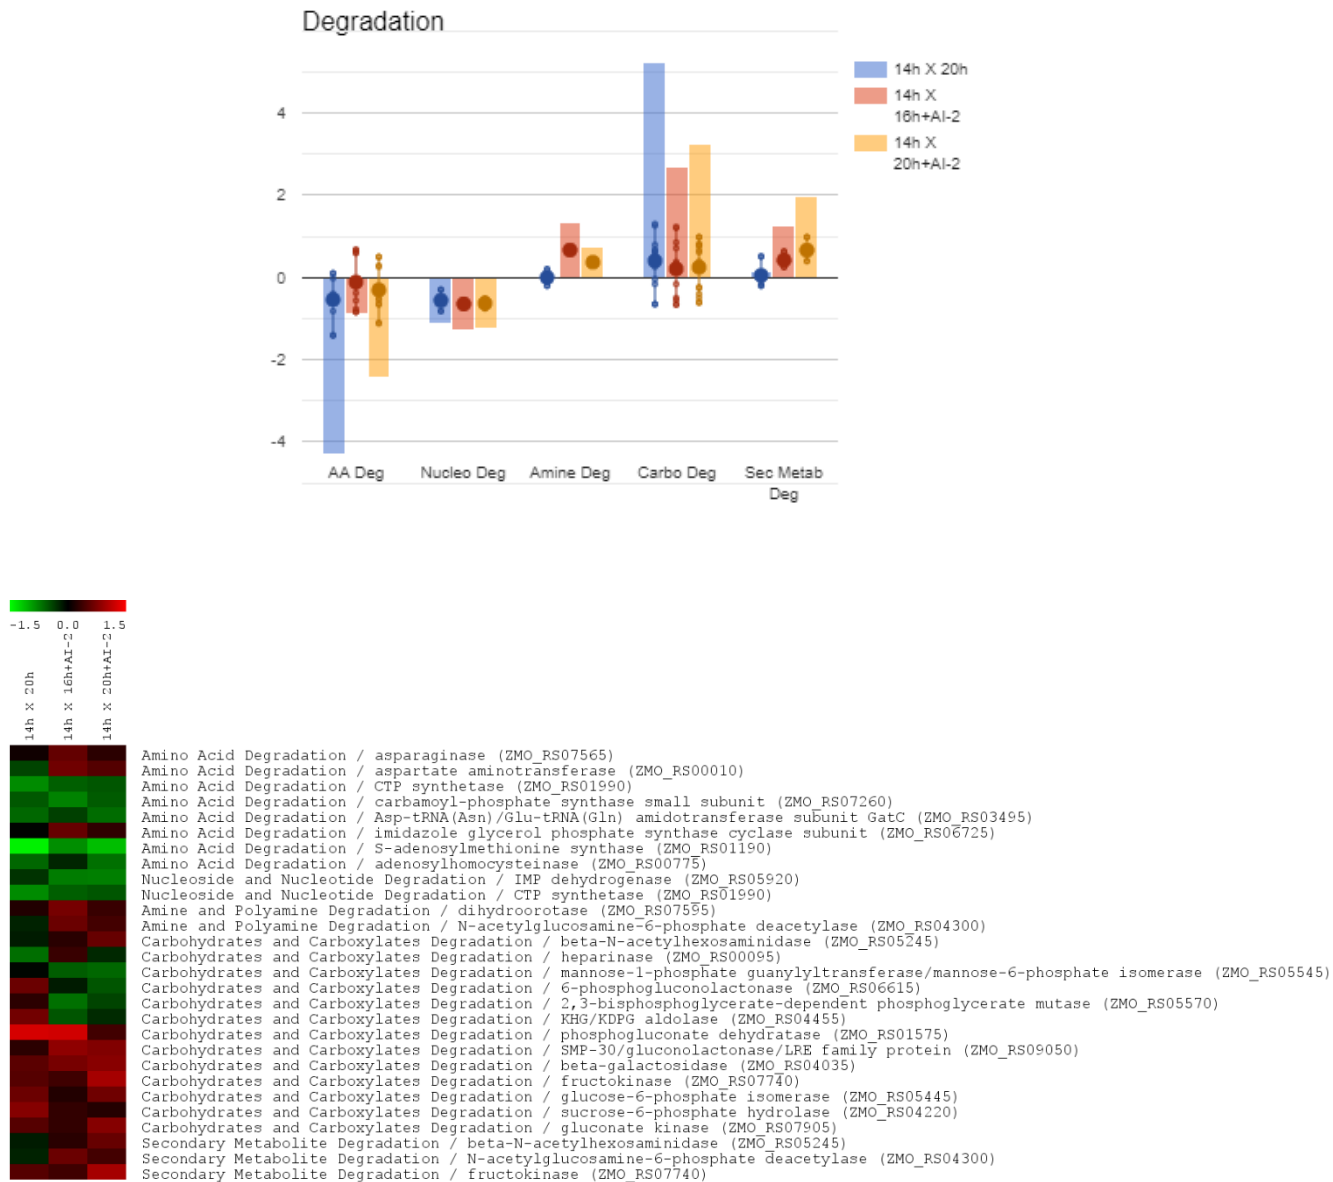

Supplementary Material S3D – Cell Exterior Structures

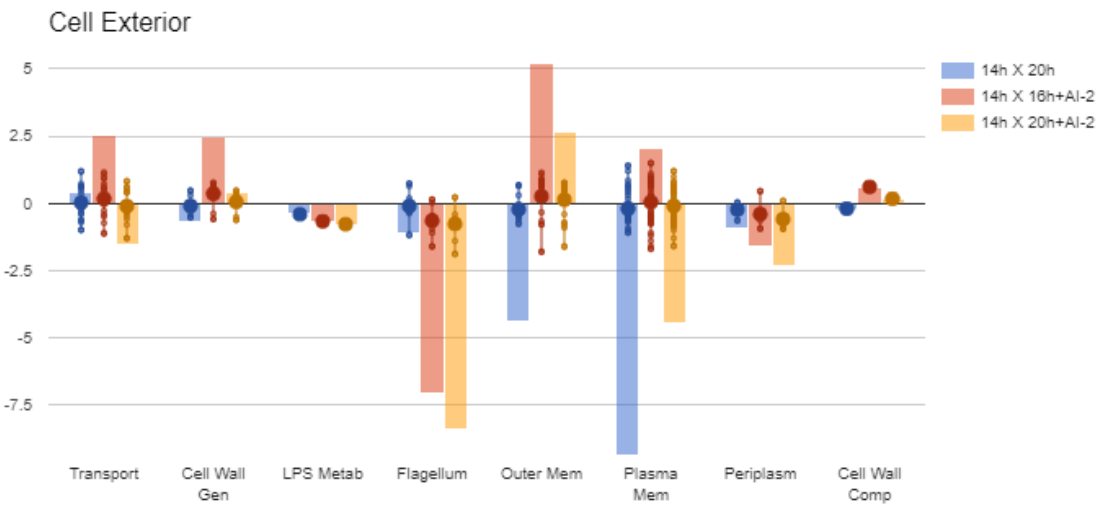

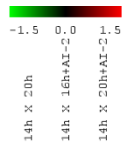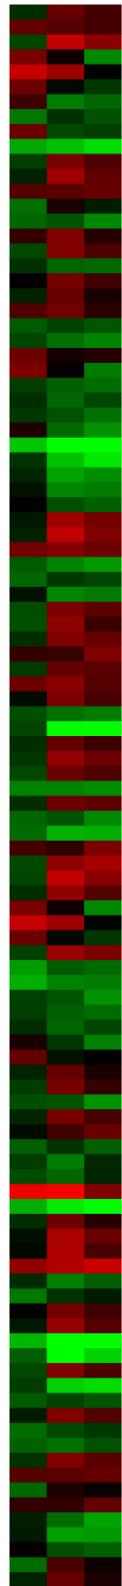

Transport Proteins / sugar porter family MFS transporter (ZMO\_RS01265)  
 Transport Proteins / PTS fructose transporter subunit IIA (ZMO\_RS05945)  
 Transport Proteins / sulfite exporter TauE/SafE family protein (ZMO\_RS00230)  
 Transport Proteins / FOF1 ATP synthase subunit delta (ZMO\_RS01030)  
 Transport Proteins / ATP synthase subunit alpha (ZMO\_RS01035)  
 Transport Proteins / ATP synthase subunit gamma (ZMO\_RS01040)  
 Transport Proteins / FOF1 ATP synthase subunit epsilon (ZMO\_RS01050)  
 Transport Proteins / ammonium transporter (ZMO\_RS01475)  
 Transport Proteins / FOF1 ATP synthase subunit C (ZMO\_RS02975)  
 Transport Proteins / MotA/TolQ/ExbB proton channel family protein (ZMO\_RS07725)  
 Transport Proteins / nucleoside transporter (ZMO\_RS04325)  
 Transport Proteins / ethanolamine permease (ZMO\_RS06160)  
 Transport Proteins / LPS export ABC transporter permease LptF (ZMO\_RS06225)  
 Transport Proteins / purine nucleoside permease (ZMO\_RS06505)  
 Transport Proteins / 2-keto-3-deoxygluconate permease (ZMO\_RS07900)  
 Cell Wall Biogenesis/Organization Proteins / penicillin-binding protein 2 (ZMO\_RS01535)  
 Cell Wall Biogenesis/Organization Proteins / rod shape-determining protein RodA (ZMO\_RS01540)  
 Cell Wall Biogenesis/Organization Proteins / UDP-N-acetylmuramoyl-L-alanyl-D-glutamate--2, 6-diaminopimelate ligase (ZMO\_RS03690)  
 Cell Wall Biogenesis/Organization Proteins / phospho-N-acetylmuramoyl-pentapeptide- transferase (ZMO\_RS03700)  
 Cell Wall Biogenesis/Organization Proteins / monofunctional biosynthetic peptidoglycan transglycosylase (ZMO\_RS04290)  
 Cell Wall Biogenesis/Organization Proteins / septal ring lytic transglycosylase RlpA family protein (ZMO\_RS04865)  
 Cell Wall Biogenesis/Organization Proteins / endolytic transglycosylase MltG (ZMO\_RS05720)  
 Lipopolysaccharide Metabolism Proteins / 3-deoxy-8-phosphooctulonate synthase (ZMO\_RS06665)  
 Flagellar Proteins / flagellin (ZMO\_RS02795)  
 Flagellar Proteins / flagellar hook protein FlgE (ZMO\_RS02720)  
 Flagellar Proteins / flagellar motor switch protein FlgM (ZMO\_RS02815)  
 Flagellar Proteins / flagellar motor switch protein FlhN (ZMO\_RS02855)  
 Flagellar Proteins / flagellar M-ring protein FlhF (ZMO\_RS02810)  
 Flagellar Proteins / flagellar basal-body rod protein FlgF (ZMO\_RS02715)  
 Flagellar Proteins / flagellar basal body rod protein FlgB (ZMO\_RS02735)  
 Flagellar Proteins / flagellar basal body rod protein FlgC (ZMO\_RS02730)  
 Flagellar Proteins / flagellar basal-body rod protein FlgG (ZMO\_RS02710)  
 Flagellar Proteins / flagellar L-ring protein (ZMO\_RS02705)  
 Flagellar Proteins / flagellar P-ring protein (ZMO\_RS02700)  
 Outer Membrane Proteins / outer membrane autotransporter barrel domain-containing protein (ZMO\_RS00915)  
 Outer Membrane Proteins / channel protein TolC (ZMO\_RS01095)  
 Outer Membrane Proteins / glycine zipper 2TM domain-containing protein (ZMO\_RS01875)  
 Outer Membrane Proteins / hypothetical protein (ZMO\_RS06420)  
 Outer Membrane Proteins / transglycosylase (ZMO\_RS07335)  
 Outer Membrane Proteins / flagellar L-ring protein (ZMO\_RS02705)  
 Outer Membrane Proteins / TonB-dependent receptor (ZMO\_RS00005)  
 Outer Membrane Proteins / carbohydrate porin (ZMO\_RS00270)  
 Outer Membrane Proteins / TonB-dependent receptor (ZMO\_RS00540)  
 Outer Membrane Proteins / TonB-dependent receptor (ZMO\_RS03520)  
 Outer Membrane Proteins / TonB-dependent receptor (ZMO\_RS03545)  
 Outer Membrane Proteins / carbohydrate porin (ZMO\_RS03785)  
 Outer Membrane Proteins / TonB-dependent receptor (ZMO\_RS04025)  
 Outer Membrane Proteins / outer membrane protein assembly factor BamA (ZMO\_RS05140)  
 Outer Membrane Proteins / flagellar motor protein MotB (ZMO\_RS06055)  
 Outer Membrane Proteins / TonB-dependent receptor (ZMO\_RS06000)  
 Outer Membrane Proteins / TonB-dependent siderophore receptor (ZMO\_RS07315)  
 Outer Membrane Proteins / TonB-dependent receptor (ZMO\_RS08160)  
 Outer Membrane Proteins / outer membrane protein assembly factor BamD (ZMO\_RS07910)  
 Outer Membrane Proteins / carbohydrate porin (ZMO\_RS08390)  
 Plasma Membrane Proteins / 2-keto-3-deoxygluconate permease (ZMO\_RS07900)  
 Plasma Membrane Proteins / membrane protein insertase YidC (ZMO\_RS07290)  
 Plasma Membrane Proteins / YnfA family protein (ZMO\_RS06995)  
 Plasma Membrane Proteins / LytE family translocator (ZMO\_RS00205)  
 Plasma Membrane Proteins / sulfite exporter TauE/SafE family protein (ZMO\_RS00230)  
 Plasma Membrane Proteins / iron ABC transporter permease (ZMO\_RS00985)  
 Plasma Membrane Proteins / FOF1 ATP synthase subunit delta (ZMO\_RS01030)  
 Plasma Membrane Proteins / ATP synthase subunit alpha (ZMO\_RS01035)  
 Plasma Membrane Proteins / ATP synthase subunit gamma (ZMO\_RS01040)  
 Plasma Membrane Proteins / cytochrome c biogenesis ATP-binding export protein CcmA (ZMO\_RS01125)  
 Plasma Membrane Proteins / MarC family protein (ZMO\_RS01775)  
 Plasma Membrane Proteins / preprotein translocase subunit SecG (ZMO\_RS01995)  
 Plasma Membrane Proteins / preprotein translocase subunit SecY (ZMO\_RS02360)  
 Plasma Membrane Proteins / flagellar motor switch protein FlhG (ZMO\_RS02815)  
 Plasma Membrane Proteins / flagellar motor switch protein FlhN (ZMO\_RS02855)  
 Plasma Membrane Proteins / ATPase (ZMO\_RS02985)  
 Plasma Membrane Proteins / copper-translocating P-type ATPase (ZMO\_RS04090)  
 Plasma Membrane Proteins / monofunctional biosynthetic peptidoglycan transglycosylase (ZMO\_RS04290)  
 Plasma Membrane Proteins / ABC transporter permease (ZMO\_RS04490)  
 Plasma Membrane Proteins / RFP metalloprotease Reep (ZMO\_RS05145)  
 Plasma Membrane Proteins / cytochrome c-type biogenesis protein CcmE (ZMO\_RS05630)  
 Plasma Membrane Proteins / LytE family translocator (ZMO\_RS05990)  
 Plasma Membrane Proteins / GTPase Era (ZMO\_RS06180)  
 Plasma Membrane Proteins / disulfide bond formation protein B (ZMO\_RS07495)  
 Plasma Membrane Proteins / ubiquinone biosynthesis protein UbiB (ZMO\_RS07500)  
 Plasma Membrane Proteins / transporter (ZMO\_RS07555)  
 Plasma Membrane Proteins / biopolymer transporter ExbD (ZMO\_RS07720)  
 Plasma Membrane Proteins / electron transport complex subunit RxxG (ZMO\_RS08135)  
 Plasma Membrane Proteins / electron transport complex subunit RxxC (ZMO\_RS08145)  
 Plasma Membrane Proteins / 4Fe-4S dicluster domain-containing protein (ZMO\_RS08150)  
 Plasma Membrane Proteins / FAD:protein FMN transferase (ZMO\_RS08290)  
 Plasma Membrane Proteins / protein translocase subunit SecF (ZMO\_RS08595)  
 Plasma Membrane Proteins / signal peptide peptidase SppA (ZMO\_RS08750)  
 Plasma Membrane Proteins / phospho-N-acetylmuramoyl-pentapeptide- transferase (ZMO\_RS03700)  
 Plasma Membrane Proteins / iron ABC transporter permease (ZMO\_RS08310)  
 Plasma Membrane Proteins / biopolymer transporter ExbD (ZMO\_RS07715)  
 Plasma Membrane Proteins / preprotein translocase subunit SecE (ZMO\_RS03230)  
 Plasma Membrane Proteins / rod shape-determining protein RodA (ZMO\_RS01540)  
 Plasma Membrane Proteins / large conductance mechanosensitive channel protein MscL (ZMO\_RS04675)  
 Plasma Membrane Proteins / endolytic transglycosylase MltG (ZMO\_RS05720)  
 Plasma Membrane Proteins / MFS transporter (ZMO\_RS08350)  
 Plasma Membrane Proteins / ribonuclease E/G (ZMO\_RS00830)  
 Plasma Membrane Proteins / multidrug ABC transporter permease (ZMO\_RS01745)  
 Plasma Membrane Proteins / ABC transporter ATP-binding protein/permease (ZMO\_RS03565)  
 Plasma Membrane Proteins / LPS export ABC transporter permease LptF (ZMO\_RS06225)  
 Plasma Membrane Proteins / ABC transporter permease (ZMO\_RS07145)  
 Plasma Membrane Proteins / twin-arginine translocase subunit TatB (ZMO\_RS05480)  
 Periplasmic Proteins / protein TolB (ZMO\_RS00655)  
 Periplasmic Proteins / PDZ domain-containing protein (ZMO\_RS01015)  
 Periplasmic Proteins / flagellar P-ring protein (ZMO\_RS02700)  
 Periplasmic Proteins / acid phosphatase (ZMO\_RS00545)  
 Cell Wall Component Proteins / monofunctional biosynthetic peptidoglycan transglycosylase (ZMO\_RS04290)

Supplementary Material S3E – Cellular Processes

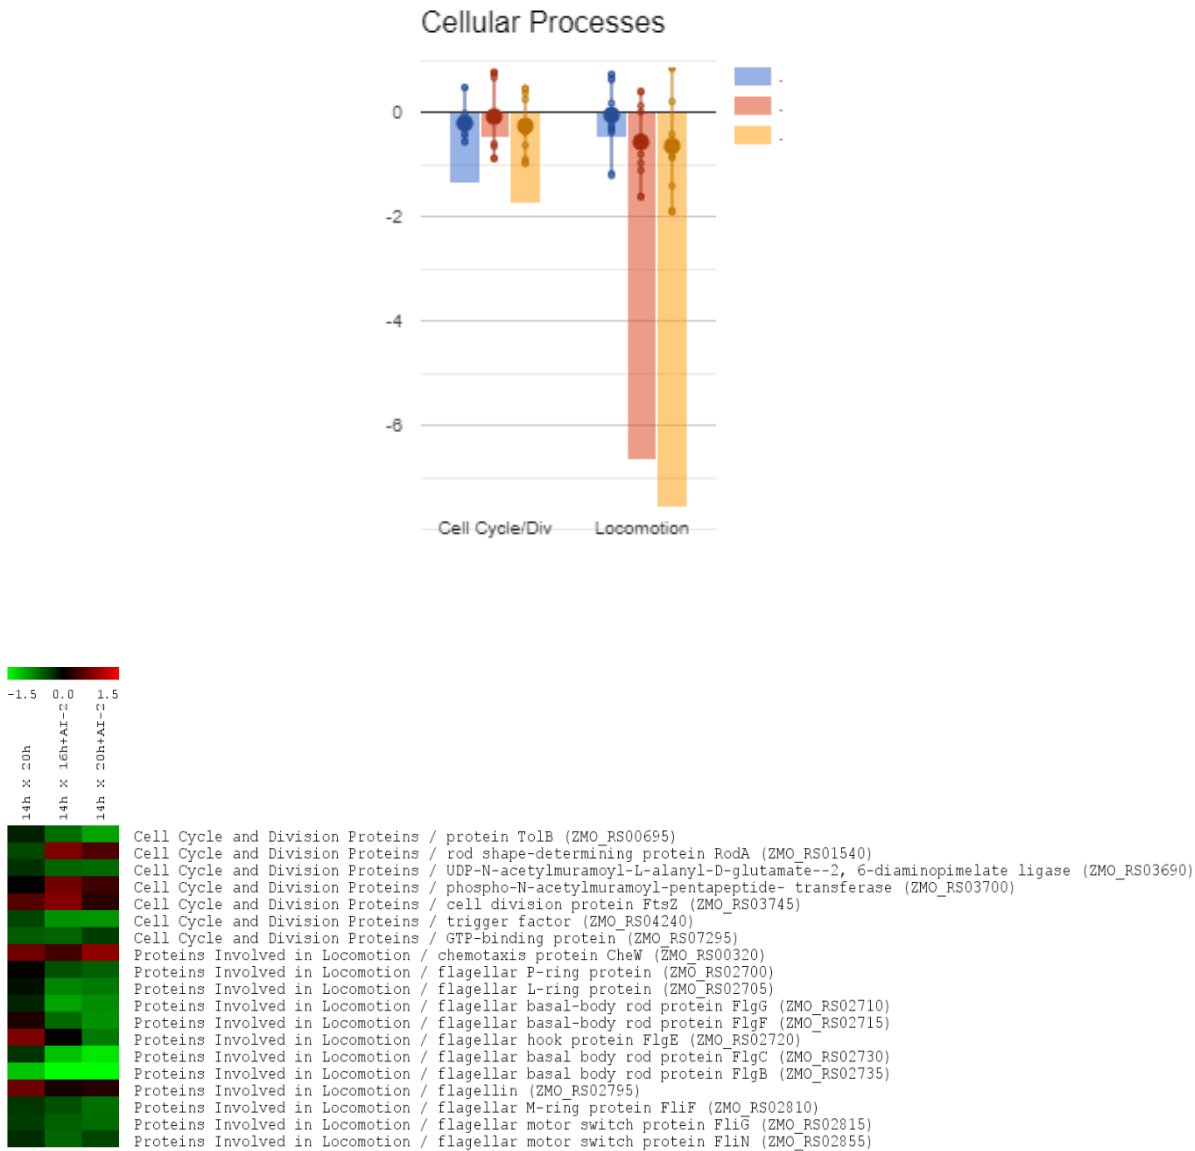

Supplementary Material S3F – Response to Stimulus

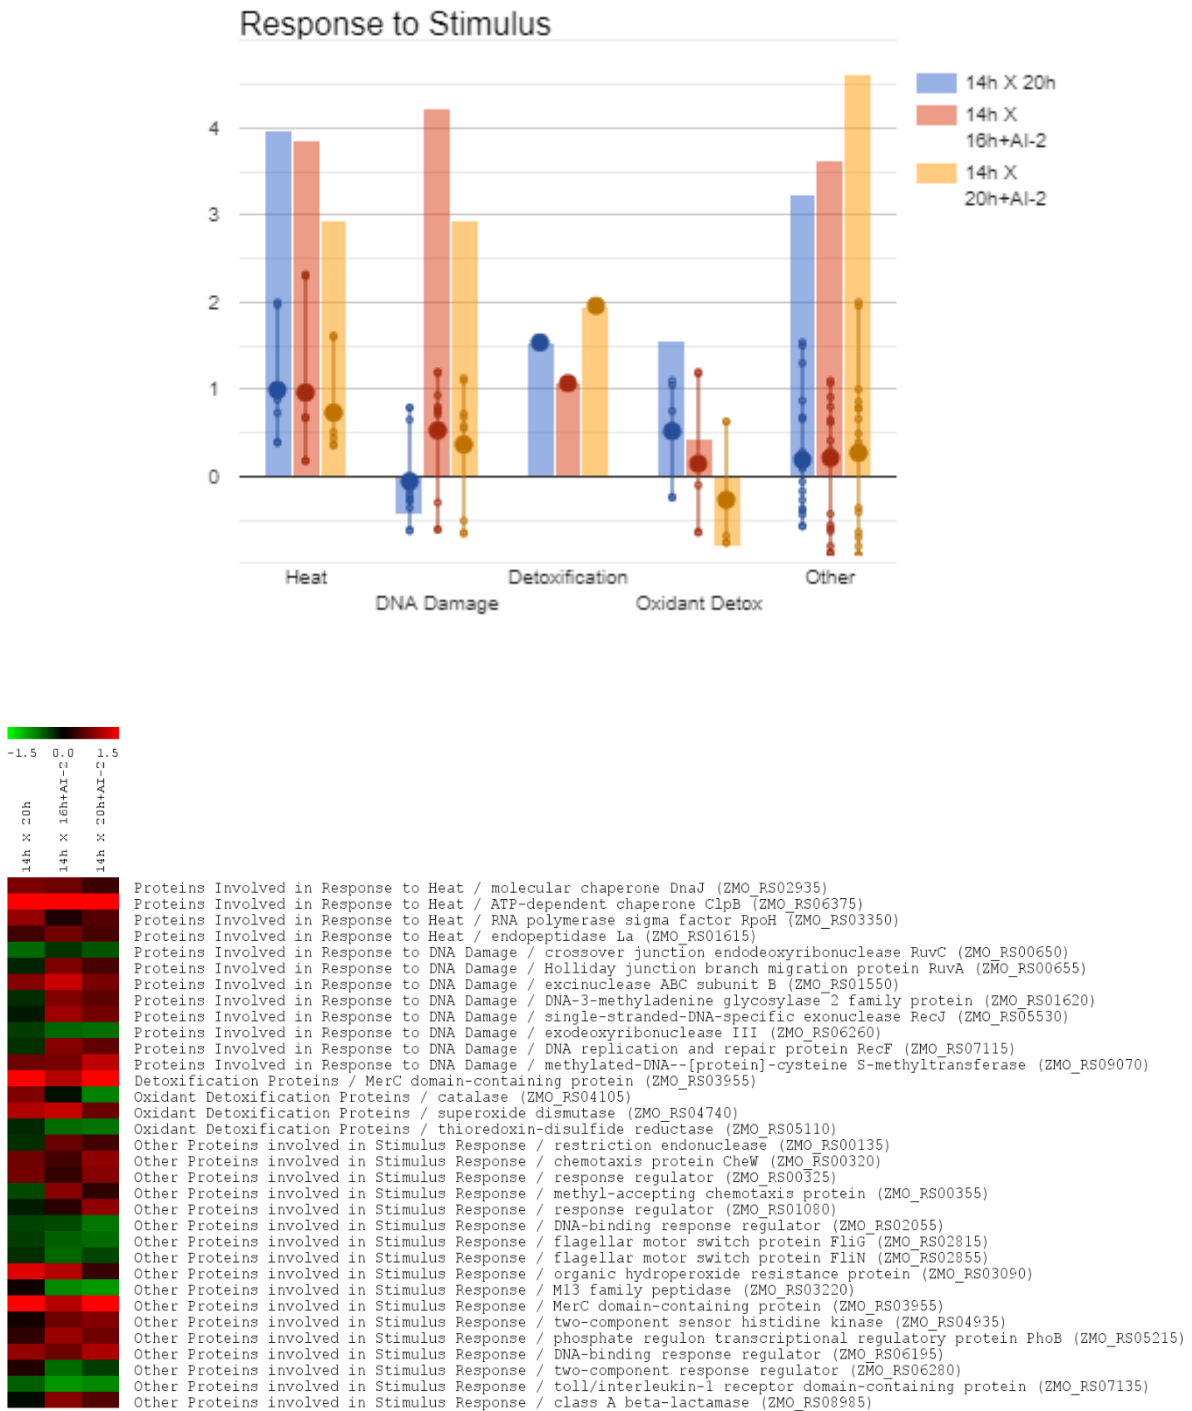

Supplementary Material S3G – Energy Metabolism

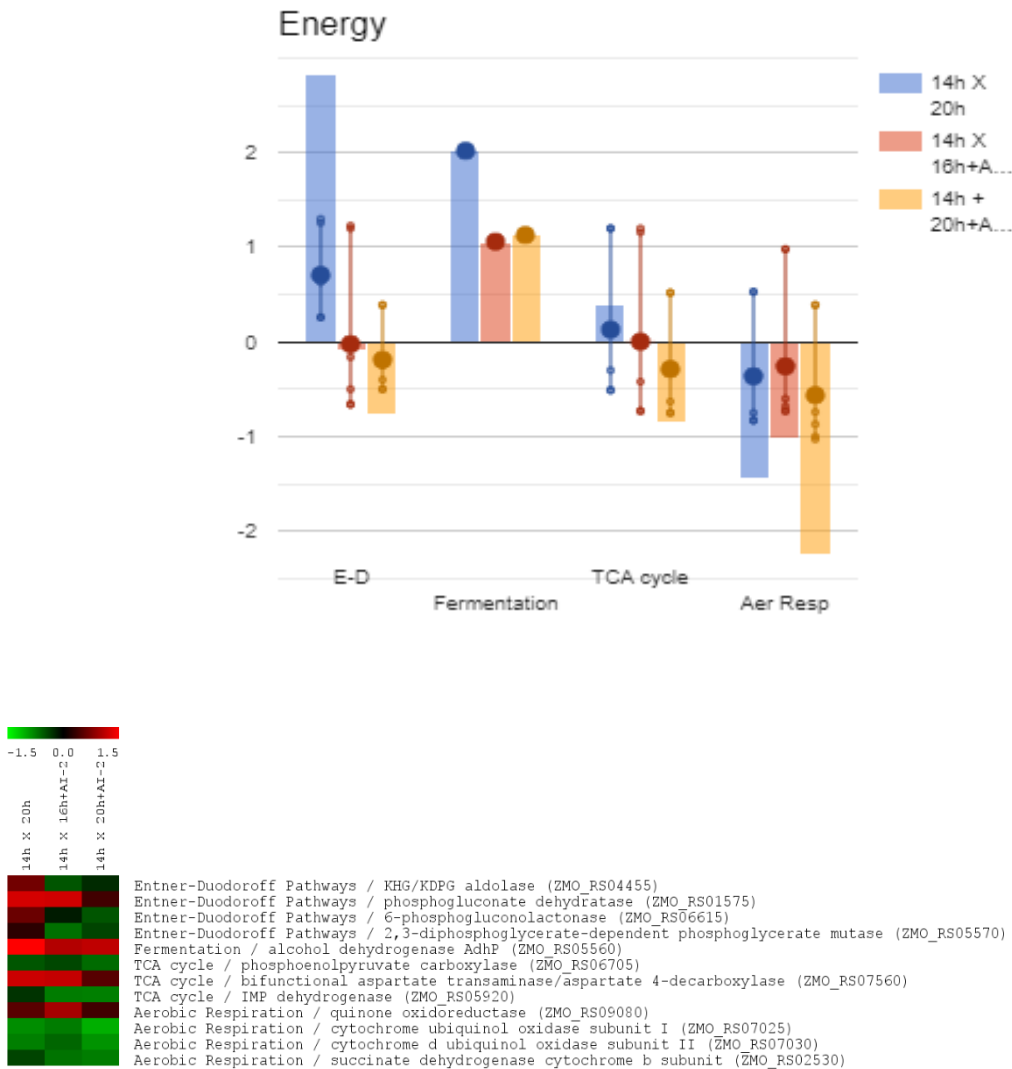



Supplementary Material S2H – Other Metabolic Pathways

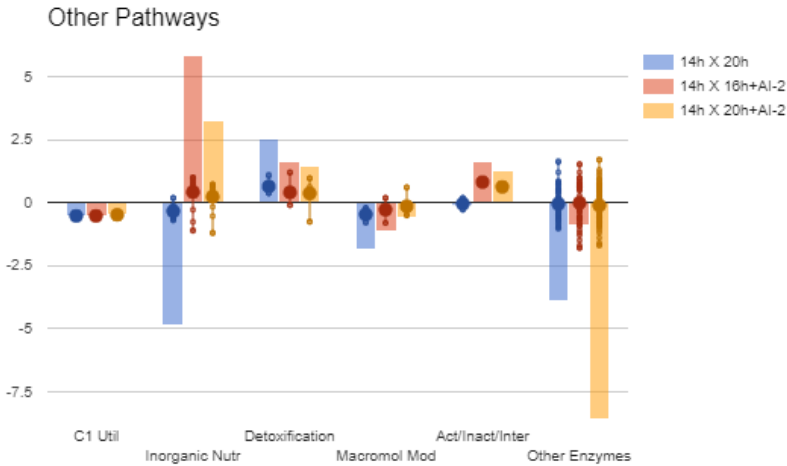

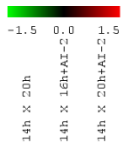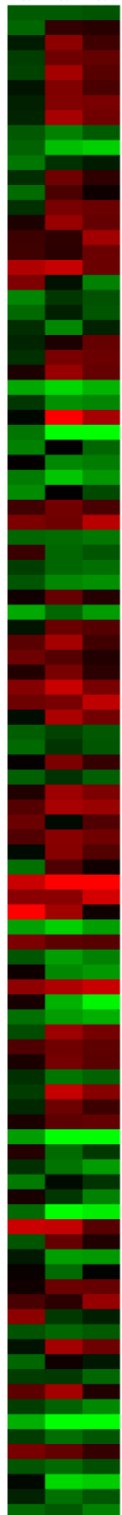

|                                                                                                                  |
|------------------------------------------------------------------------------------------------------------------|
| Cl Compound Utilization and Assimilation / formate--tetrahydrofolate ligase (ZMO_RS01960)                        |
| Inorganic Nutrient Metabolism / ammonia monooxygenase (ZMO_RS08530)                                              |
| Inorganic Nutrient Metabolism / ammonia monooxygenase (ZMO_RS08550)                                              |
| Inorganic Nutrient Metabolism / nitrogenase iron-molybdenum cofactor biosynthesis protein NifN (ZMO_RS08220)     |
| Inorganic Nutrient Metabolism / nitrogenase iron-molybdenum cofactor biosynthesis protein NifE (ZMO_RS08215)     |
| Inorganic Nutrient Metabolism / nitrogenase molybdenum-iron protein subunit beta (ZMO_RS08210)                   |
| Inorganic Nutrient Metabolism / nitrogenase molybdenum-iron protein alpha chain (ZMO_RS08205)                    |
| Inorganic Nutrient Metabolism / nitrogenase iron protein (ZMO_RS08200)                                           |
| Inorganic Nutrient Metabolism / carbamoyl-phosphate synthase small subunit (ZMO_RS07260)                         |
| Inorganic Nutrient Metabolism / argininosuccinate synthase (ZMO_RS04635)                                         |
| Inorganic Nutrient Metabolism / signal peptide peptidase SppA (ZMO_RS08750)                                      |
| Inorganic Nutrient Metabolism / low molecular weight phosphotyrosine protein phosphatase (ZMO_RS00590)           |
| Inorganic Nutrient Metabolism / acid phosphatase (ZMO_RS00545)                                                   |
| Inorganic Nutrient Metabolism / sulfate adenylyltransferase subunit CysN (ZMO_RS00020)                           |
| Inorganic Nutrient Metabolism / adenylyl-sulfate kinase (ZMO_RS00015)                                            |
| Detoxification / lactoylglutathione lyase (ZMO_RS03400)                                                          |
| Detoxification / hydroxyacylglutathione hydrolase (ZMO_RS03395)                                                  |
| Detoxification / superoxide dismutase (ZMO_RS04740)                                                              |
| Detoxification / catalase (ZMO_RS04105)                                                                          |
| Macromolecule Modification / ribonuclease D (ZMO_RS03185)                                                        |
| Macromolecule Modification / ribonuclease PH (ZMO_RS00070)                                                       |
| Macromolecule Modification / tRNA preQ1(34) S-adenosylmethionine ribosyltransferase-isomerase QueA (ZMO_RS03805) |
| Macromolecule Modification / leucyl/phenylalanyl-tRNA--protein transferase (ZMO_RS04150)                         |
| Activation/Inactivation/Interconversion / sulfate adenylyltransferase subunit CysN (ZMO_RS00020)                 |
| Activation/Inactivation/Interconversion / adenylyl-sulfate kinase (ZMO_RS00015)                                  |
| Enzymes not in Pathways / inorganic diphosphatase (ZMO_RS06760)                                                  |
| Enzymes not in Pathways / DNA polymerase III subunit beta (ZMO_RS04390)                                          |
| Enzymes not in Pathways / flavodoxin family protein (ZMO_RS08880)                                                |
| Enzymes not in Pathways / acyl carrier protein (ZMO_RS05730)                                                     |
| Enzymes not in Pathways / tRNA (guanosine(46)-N7)-methyltransferase TrmB (ZMO_RS00625)                           |
| Enzymes not in Pathways / anaerobic ribonucleoside-triphosphate reductase activating protein (ZMO_RS04605)       |
| Enzymes not in Pathways / ribonucleoside triphosphate reductase (ZMO_RS04595)                                    |
| Enzymes not in Pathways / ribulose-phosphate 3-epimerase (ZMO_RS00090)                                           |
| Enzymes not in Pathways / endopeptidase La (ZMO_RS01615)                                                         |
| Enzymes not in Pathways / aldo/keto reductase (ZMO_RS07980)                                                      |
| Enzymes not in Pathways / dCTP deaminase (ZMO_RS03855)                                                           |
| Enzymes not in Pathways / acyl carrier protein (ZMO_RS05680)                                                     |
| Enzymes not in Pathways / exodeoxyribonuclease III (ZMO_RS06260)                                                 |
| Enzymes not in Pathways / peptidyl-prolyl cis-trans isomerase (ZMO_RS02005)                                      |
| Enzymes not in Pathways / DNA topoisomerase (ATP-hydrolyzing) subunit B (ZMO_RS07110)                            |
| Enzymes not in Pathways / peptidylprolyl isomerase (ZMO_RS03445)                                                 |
| Enzymes not in Pathways / leucyl aminopeptidase family protein (ZMO_RS03595)                                     |
| Enzymes not in Pathways / quinone oxidoreductase (ZMO_RS09080)                                                   |
| Enzymes not in Pathways / DNA-directed RNA polymerase subunit beta' (ZMO_RS03270)                                |
| Enzymes not in Pathways / diene lactone hydrolase family protein (ZMO_RS09075)                                   |
| Enzymes not in Pathways / excinuclease ABC subunit B (ZMO_RS01550)                                               |
| Enzymes not in Pathways / methylated-DNA--[protein]-cysteine S-methyltransferase (ZMO_RS09070)                   |
| Enzymes not in Pathways / type I secretion system permease/ATPase (ZMO_RS01100)                                  |
| Enzymes not in Pathways / DNA topoisomerase I (ZMO_RS05355)                                                      |
| Enzymes not in Pathways / crossover junction endodeoxyribonuclease RuvC (ZMO_RS00650)                            |
| Enzymes not in Pathways / DNA primase (ZMO_RS07270)                                                              |
| Enzymes not in Pathways / GTPase Era (ZMO_RS06180)                                                               |
| Enzymes not in Pathways / helicase (ZMO_RS00935)                                                                 |
| Enzymes not in Pathways / aldo/keto reductase (ZMO_RS09055)                                                      |
| Enzymes not in Pathways / ribosomal large subunit pseudouridine synthase D (ZMO_RS03355)                         |
| Enzymes not in Pathways / pyruvate formate-lyase 1-activating enzyme (ZMO_RS07010)                               |
| Enzymes not in Pathways / class A beta-lactamase (ZMO_RS08985)                                                   |
| Enzymes not in Pathways / alkaline phosphatase family protein (ZMO_RS07200)                                      |
| Enzymes not in Pathways / nitronate monooxygenase (ZMO_RS08400)                                                  |
| Enzymes not in Pathways / amidohydrolase (ZMO_RS01340)                                                           |
| Enzymes not in Pathways / NAD-dependent succinate-semialdehyde dehydrogenase (ZMO_RS07890)                       |
| Enzymes not in Pathways / ferredoxin--NADP reductase (ZMO_RS07885)                                               |
| Enzymes not in Pathways / GTPase ObgE (ZMO_RS00810)                                                              |
| Enzymes not in Pathways / acetyl-CoA carboxylase biotin carboxyl carrier protein (ZMO_RS03290)                   |
| Enzymes not in Pathways / M13 family peptidase (ZMO_RS03220)                                                     |
| Enzymes not in Pathways / FAD:protein FMN transferase (ZMO_RS08290)                                              |
| Enzymes not in Pathways / aldo/keto reductase (ZMO_RS06010)                                                      |
| Enzymes not in Pathways / ribose 5-phosphate isomerase B (ZMO_RS05385)                                           |
| Enzymes not in Pathways / homocitrate synthase (ZMO_RS08260)                                                     |
| Enzymes not in Pathways / lytic murein transglycosylase (ZMO_RS04860)                                            |
| Enzymes not in Pathways / glyoxylate/hydroxypyruvate reductase A (ZMO_RS08535)                                   |
| Enzymes not in Pathways / DNA-directed RNA polymerase subunit omega (ZMO_RS07745)                                |
| Enzymes not in Pathways / glycerate kinase (ZMO_RS00250)                                                         |
| Enzymes not in Pathways / 16S rRNA (uracil(1498)-N(3))-methyltransferase (ZMO_RS06955)                           |
| Enzymes not in Pathways / DNA topoisomerase IV subunit B (ZMO_RS01770)                                           |
| Enzymes not in Pathways / tRNA (guanosine(37)-N1)-methyltransferase TrmD (ZMO_RS04820)                           |
| Enzymes not in Pathways / uracil-DNA glycosylase (ZMO_RS05310)                                                   |
| Enzymes not in Pathways / ribosomal RNA small subunit methyltransferase H (ZMO_RS03675)                          |
| Enzymes not in Pathways / FKBP-type peptidyl-prolyl cis-trans isomerase (ZMO_RS07705)                            |
| Enzymes not in Pathways / ATPase (ZMO_RS02985)                                                                   |
| Enzymes not in Pathways / polyribonucleotide nucleotidyltransferase (ZMO_RS02430)                                |
| Enzymes not in Pathways / aspartate 4-decarboxylase (ZMO_RS07560)                                                |
| Enzymes not in Pathways / aryl-sulfate sulfotransferase (ZMO_RS01305)                                            |
| Enzymes not in Pathways / PDZ domain-containing protein (ZMO_RS01015)                                            |
| Enzymes not in Pathways / histidine kinase (ZMO_RS03055)                                                         |
| Enzymes not in Pathways / DNA polymerase III subunit chi (ZMO_RS05860)                                           |
| Enzymes not in Pathways / HD domain-containing protein (ZMO_RS06650)                                             |
| Enzymes not in Pathways / aldo/keto reductase (ZMO_RS04375)                                                      |
| Enzymes not in Pathways / ATPase (ZMO_RS02425)                                                                   |
| Enzymes not in Pathways / ubiquinol-cytochrome c reductase iron-sulfur subunit (ZMO_RS04275)                     |
| Enzymes not in Pathways / 16S rRNA (guanine(966)-N(2))-methyltransferase RsmD (ZMO_RS02565)                      |
| Enzymes not in Pathways / 23S rRNA (guanosine(2251)-2'-O)-methyltransferase RlmB (ZMO_RS01000)                   |
| Enzymes not in Pathways / leucyl aminopeptidase (ZMO_RS05865)                                                    |
| Enzymes not in Pathways / DNA polymerase III subunit delta (ZMO_RS06415)                                         |
| Enzymes not in Pathways / DNA-directed RNA polymerase subunit alpha (ZMO_RS02380)                                |
| Enzymes not in Pathways / S41 family peptidase (ZMO_RS07490)                                                     |
| Enzymes not in Pathways / ATP-dependent Clp protease proteolytic subunit (ZMO_RS04250)                           |
| Enzymes not in Pathways / 23S rRNA (pseudouridine(1915)-N(3))-methyltransferase RlmH (ZMO_RS07480)               |
| Enzymes not in Pathways / carbonic anhydrase (ZMO_RS05065)                                                       |
| Enzymes not in Pathways / 4-hydroxy-3-methylbut-2-enyl diphosphate reductase (ZMO_RS03915)                       |
| Enzymes not in Pathways / ribonuclease H (ZMO_RS07185)                                                           |
