# Supplementary material for: The Quorum Sensing Auto-Inducer 2 (AI-2) Stimulates Nitrogen Fixation and Favors Ethanol Production over Biomass Accumulation in Zymomonas mobilis
Source: MDPI journal article supplement (doi:10.3390/ijms22115628), 2021-05-26
Supplement: s1 [file s1]

**Supplementary Material S5-** Primers used for qPCR of randomly selected genes.

Alencar *et al.* (2021). The quorum sensing auto-inducer 2 (AI-2) stimulates nitrogen fixation and favors ethanol production over biomass accumulation in *Zymomonas mobilis*. *Int. J. Mol. Sci.* Submitted.

| LocusTag_ID | Description                                                            | Forward primer          | Reverse primer         |
|-------------|------------------------------------------------------------------------|-------------------------|------------------------|
| ZMO_RS00220 | alpha/beta hydrolase                                                   | GCGATTGTCGTCGCTTTATC    | CCGATCAGATGTTGCCATTG   |
| ZMO_RS05560 | alcohol dehydrogenase                                                  | GTGCTTGACGGTATCGAAGT    | GCTTGGTGACTTTTCGGTTTG  |
| ZMO_RS08755 | co-chaperonin GroES                                                    | GACAGCTGGCGGTATCATT     | TTCGCTATGGGTTCCGTTAC   |
| ZMO_RS00205 | lysine exporter protein                                                | GGTGTGCTTCGACTTACCT     | GAAGGCTGCAAGGGAGTAAT   |
| ZMO_RS08485 | glutaredoxin-like protein                                              | CCGGATCAAAGAAGTTCTGG    | CCGCATTAGAATAGAGACG    |
| ZMO_RS05980 | LysR family transcriptional regulator                                  | CTTGCGGATTGAGCTTTACG    | CGACCAATGCGATCGAGATA   |
| ZMO_RS04025 | TonB-dependent receptor                                                | ACGCGGTGGTTTCTTCTT      | TGTCGTGCTCGTCTGATTAC   |
| ZMO_RS00175 | sigma 54 modulation protein/ribosomal protein S30EA                    | GCCTCTGTCACTTTTCGGTAATC | GCATGGGCGTCTTTGTCTAT   |
| ZMO_RS07220 | phosphopyruvate hydratase                                              | TTATAAGCCGGGCGAAGATG    | GTTTACGGCCTTCACCCTTA   |
| ZMO_RS02370 | 30S ribosomal protein S13                                              | CCCACAAACAAACGTGTAG     | TCAGAAAGATCCTGGACACG   |
| ZMO_RS06270 | peptidase M23                                                          | CCGTTATGCCGTTGCTCATA    | TCGCGATTGATGGGTTCTTC   |
| ZMO_RS04470 | 5-methyltetrahydropteroyltriglutamate-homocysteine S-methyltransferase | CAAAGCGTCAGAGCCCTTAT    | AATGGTCGTCGTCGGATAGA   |
| ZMO_RS06320 | MucR family transcriptional regulator                                  | ATCTGCCTCGAAGACGGTAA    | TTAGCGCGGTATTGTTCCG    |
| ZMO_RS02245 | elongation factor G                                                    | CCACAACCGAGCGTATTCTT    | TGTTCTGCTCCATCCAATC    |
| ZMO_RS00755 | glyceraldehyde-3-phosphate dehydrogenase, type I                       | CTGACCGCAGATGACAAGAT    | CTGTGAACGGTGGTCATCAA   |
| ZMO_RS03200 | transcription elongation factor GreB                                   | CCAAGGCAGAATAAGCTGGA    | CTGGTAGGCGGACAATTCTAAG |
| ZMO_RS04395 | ABC transporter-like protein                                           | CTTGGAACAGGTGGGACTTT    | TGGCTGCCCTTTGTCTTT     |
| ZMO_RS01520 | rod shape-determining protein MreB                                     | GAAAGTGCATGGCGGTAAAG    | CGAATAGCGCTCTTTCAAC    |
| ZMO_RS08860 | PhzF family phenazine biosynthesis protein                             | CGAATGCAAGGCACTGAAAG    | AAGGTACGCACACGGATT     |
| ZMO_RS01575 | phosphogluconate dehydratase                                           | TTGGCTACCAGCGTTTCT      | CAACAGACCAGGGACAATCT   |
| ZMO_RS03720 | UDP-N-acetylmuramate-L-alanine ligase                                  | TCGGGATAGACGGCTGATTA    | AGCGGTTACCACCAGAGATA   |
