# Supplementary material for: The Quorum Sensing Auto-Inducer 2 (AI-2) Stimulates Nitrogen Fixation and Favors Ethanol Production over Biomass Accumulation in Zymomonas mobilis
Source: MDPI journal article supplement (doi:10.3390/ijms22115628), 2021-05-26
Supplement: s1 [file s1]

**Supplementary Material S1** – Expression patterns of the 724 *Z. mobilis* genes identified as modulated in response to AI-2.

Alencar *et al.* (2021). The quorum sensing auto-inducer 2 (AI-2) stimulates nitrogen fixation and favors ethanol production over biomass accumulation in *Zymomonas mobilis*. *Int. J. Mol. Sci.* Submitted.

.

-1.5 0.0 1.5

14h x 20h  
14h x AI-2 16 h  
14h x AI-2 20h

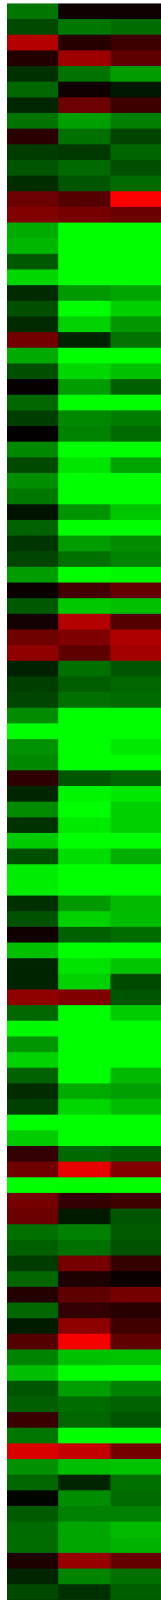

(2FE-2S)-BINDING PROTEIN ZMO\_R806305  
(D)CMP KINASE ZMO\_R808085  
(FE-S)-BINDING PROTEIN ZMO\_R800110  
1-(5-PHOSPHORIBOSYL)-5 ZMO\_R806730  
16S RNA (CYTOSINE(1402)-N(4))-METHYLTRANSFERASE RSMH ZMO\_R803675  
16S RNA (GUANINE(966)-N(2))-METHYLTRANSFERASE RSMO ZMO\_R802565  
16S RNA (URACIL(1498)-N(3))-METHYLTRANSFERASE ZMO\_R806555  
16S RNA PROCESSING PROTEIN RIMM ZMO\_R804815  
2,3-DIPHOSPHOGlycerate-DEPENDENT PHOSPHOGlycerate MUTASE ZMO\_R805570  
23S RNA (GUANOSINE(2251)-2\''-O)-METHYLTRANSFERASE RIMB ZMO\_R801000  
23S RNA (PSEUDOURIDINE(1915)-N(3))-METHYLTRANSFERASE RIMH ZMO\_R807480  
2-HYDROXYACID DEHYDROGENASE ZMO\_R805565  
2-ISOPROPYLMALATE SYNTHASE ZMO\_R804030  
3,4-DIHYDROXY-2-BUTANONE-4-PHOSPHATE SYNTHASE ZMO\_R802035  
30S RIBOSOMAL PROTEIN S1 ZMO\_R808090  
30S RIBOSOMAL PROTEIN S11 ZMO\_R802375  
30S RIBOSOMAL PROTEIN S12 ZMO\_R802235  
30S RIBOSOMAL PROTEIN S13 ZMO\_R802370  
30S RIBOSOMAL PROTEIN S14 ZMO\_R802325  
30S RIBOSOMAL PROTEIN S15 ZMO\_R802435  
30S RIBOSOMAL PROTEIN S16 ZMO\_R804810  
30S RIBOSOMAL PROTEIN S17 ZMO\_R802305  
30S RIBOSOMAL PROTEIN S18 ZMO\_R805510  
30S RIBOSOMAL PROTEIN S19 ZMO\_R802280  
30S RIBOSOMAL PROTEIN S2 ZMO\_R805180  
30S RIBOSOMAL PROTEIN S20 ZMO\_R806075  
30S RIBOSOMAL PROTEIN S21 ZMO\_R807710  
30S RIBOSOMAL PROTEIN S3 ZMO\_R802290  
30S RIBOSOMAL PROTEIN S4 ZMO\_R806110  
30S RIBOSOMAL PROTEIN S5 ZMO\_R802345  
30S RIBOSOMAL PROTEIN S6 ZMO\_R805505  
30S RIBOSOMAL PROTEIN S7 ZMO\_R802240  
30S RIBOSOMAL PROTEIN S8 ZMO\_R802330  
30S RIBOSOMAL PROTEIN S9 ZMO\_R803945  
3-DEOXY-7-PHOSPHOHEPTULONATE SYNTHASE ZMO\_R800795  
3-DEOXY-8-PHOSPHOCTULONATE SYNTHASE ZMO\_R806665  
3-HYDROXYACYL-ACP DEHYDRATASE FAB2 ZMO\_R805130  
3-ISOPROPYLMALATE DEHYDRATASE LARGE SUBUNIT ZMO\_R800435  
3-ISOPROPYLMALATE DEHYDROGENASE ZMO\_R803015  
3-METHYL-2-OXOBUTANONE HYDROXYMETHYLTRANSFERASE ZMO\_R808905  
3-METHYL-2-OXOBUTANONE HYDROXYMETHYLTRANSFERASE ZMO\_R808995  
3-OXOACYL-ACP REDUCTASE FABG ZMO\_R805485  
4-HYDROXY-3-METHYLBUT-2-ENYL DIPHOSPHATE REDUCTASE ZMO\_R803915  
5-(CARBOXYAMINO)IMIDAZOLE RIBONUCLEOTIDE MUTASE ZMO\_R806355  
5-(CARBOXYAMINO)IMIDAZOLE RIBONUCLEOTIDE SYNTHASE ZMO\_R806360  
50S RIBOSOMAL PROTEIN L1 ZMO\_R803245  
50S RIBOSOMAL PROTEIN L10 ZMO\_R803250  
50S RIBOSOMAL PROTEIN L11 ZMO\_R803240  
50S RIBOSOMAL PROTEIN L13 ZMO\_R803950  
50S RIBOSOMAL PROTEIN L14 ZMO\_R802310  
50S RIBOSOMAL PROTEIN L15 ZMO\_R802355  
50S RIBOSOMAL PROTEIN L17 ZMO\_R802385  
50S RIBOSOMAL PROTEIN L18 ZMO\_R802340  
50S RIBOSOMAL PROTEIN L19 ZMO\_R804825  
50S RIBOSOMAL PROTEIN L2 ZMO\_R802275  
50S RIBOSOMAL PROTEIN L20 ZMO\_R806800  
50S RIBOSOMAL PROTEIN L21 ZMO\_R800910  
50S RIBOSOMAL PROTEIN L22 ZMO\_R802285  
50S RIBOSOMAL PROTEIN L23 ZMO\_R802270  
50S RIBOSOMAL PROTEIN L24 ZMO\_R802315  
50S RIBOSOMAL PROTEIN L25/GENERAL STRESS PROTEIN CTC ZMO\_R806670  
50S RIBOSOMAL PROTEIN L27 ZMO\_R800905  
50S RIBOSOMAL PROTEIN L28 ZMO\_R801270  
50S RIBOSOMAL PROTEIN L29 ZMO\_R802300  
50S RIBOSOMAL PROTEIN L3 ZMO\_R802260  
50S RIBOSOMAL PROTEIN L31 ZMO\_R805125  
50S RIBOSOMAL PROTEIN L33 ZMO\_R801075  
50S RIBOSOMAL PROTEIN L36 ZMO\_R805585  
50S RIBOSOMAL PROTEIN L4 ZMO\_R802265  
50S RIBOSOMAL PROTEIN L5 ZMO\_R802320  
50S RIBOSOMAL PROTEIN L6 ZMO\_R802335  
50S RIBOSOMAL PROTEIN L7/L12 ZMO\_R803255  
50S RIBOSOMAL PROTEIN L9 ZMO\_R805515  
5-AMINOLEVULINATE SYNTHASE ZMO\_R805380  
5-FORMYLTETRAHYDROFOLATE CYCLO-LIGASE ZMO\_R800925  
5-METHYLTETRAHYDROPTEROYLTRIGLUTAMATE--HOMOCYSTEINE S-METHYLTRANSFERASE ZMO\_R804470  
6,7-DIMETHYL-8-RIBITYLLUMAZINE SYNTHASE ZMO\_R802030  
6-PHOSPHOGLUCONOLACTONASE ZMO\_R806615  
ABC TRANSPORTER ATP-BINDING PROTEIN ZMO\_R804610  
ABC TRANSPORTER PERMEASE ZMO\_R801745  
ABC TRANSPORTER PERMEASE ZMO\_R804400  
ABC TRANSPORTER PERMEASE ZMO\_R807145  
ABC TRANSPORTER SUBSTRATE-BINDING PROTEIN ZMO\_R808315  
ABRB FAMILY TRANSCRIPTIONAL REGULATOR ZMO\_R808530  
ABRB FAMILY TRANSCRIPTIONAL REGULATOR ZMO\_R808550  
ACETOACETATE DECARBOXYLASE FAMILY PROTEIN ZMO\_R808895  
ACETOLACTATE SYNTHASE LARGE SUBUNIT ZMO\_R803020  
ACETOLACTATE SYNTHASE SMALL SUBUNIT ZMO\_R805100  
ACETYL-COA CARBOXYLASE BIOTIN CARBOXYL CARRIER PROTEIN ZMO\_R803290  
ACETYLGLUTAMATE KINASE ZMO\_R806695  
ACYL CARRIER PROTEIN ZMO\_R805680  
ACYL CARRIER PROTEIN ZMO\_R805730  
ACYLGLYCEROL KINASE FAMILY PROTEIN ZMO\_R806215  
ADENOSINE KINASE ZMO\_R808590  
ADENOSYLHOMOCYSTEINASE ZMO\_R800775  
ADENOSYL-HOPENE TRANSFERASE HENH ZMO\_R803910  
ADENYLATE KINASE ZMO\_R802365  
ADENYLOSUCCINATE LYASE ZMO\_R802940  
ADENYLOSUCCINATE SYNTHASE ZMO\_R807585  
ADENYLYL-SULFATE KINASE ZMO\_R800015  
AI-2E FAMILY TRANSPORTER ZMO\_R802895  
ALANINE RACEMASE ZMO\_R807150

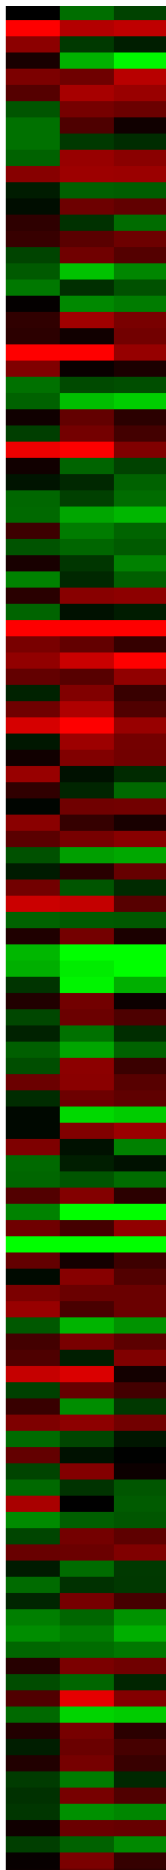

ALANINE--TRNA LIGASE ZMO\_R803775  
ALCOHOL DEHYDROGENASE ADHP ZMO\_R805560  
ALDO/KETO REDUCTASE ZMO\_R804375  
ALDO/KETO REDUCTASE ZMO\_R806010  
ALDO/KETO REDUCTASE ZMO\_R807980  
ALDO/KETO REDUCTASE ZMO\_R809055  
ALGINATE EXPORT FAMILY PROTEIN ZMO\_R808320  
ALKALINE PHOSPHATASE FAMILY PROTEIN ZMO\_R807200  
ALKYLPHOSPHONATE UTILIZATION PROTEIN ZMO\_R808300  
ALPHA/BETA HYDROLASE ZMO\_R800220  
ALPHA/BETA HYDROLASE ZMO\_R803410  
ALPHA/BETA HYDROLASE ZMO\_R804580  
AMIDOHYDROLASE FAMILY PROTEIN ZMO\_R805700  
AMIDOPHOSPHORIBOSYLTRANSFERASE ZMO\_R806965  
AMINODEOXYCHORISMATE/ANTHRANILATE SYNTHASE COMPONENT II ZMO\_R800865  
AMINOTRANSFERASE CLASS I/II-FOLD PYRIDOXAL PHOSPHATE-DEPENDENT ENZYME ZMO\_R800010  
AMINOTRANSFERASE CLASS V-FOLD PLP-DEPENDENT ENZYME ZMO\_R803010  
AMMONIUM TRANSPORTER ZMO\_R801475  
ANAEROBIC RIBONUCLEOSIDE-TRIPHOSPHATE REDUCTASE ACTIVATING PROTEIN ZMO\_R804605  
ANKYRIN REPEAT DOMAIN-CONTAINING PROTEIN ZMO\_R800160  
ANTIBIOTIC BIOSYNTHESIS MONOOXYGENASE ZMO\_R805240  
ANTIBIOTIC BIOSYNTHESIS MONOOXYGENASE ZMO\_R807100  
ANTIBIOTIC BIOSYNTHESIS MONOOXYGENASE ZMO\_R808015  
ARAC FAMILY TRANSCRIPTIONAL REGULATOR ZMO\_R806165  
ARGININOSUCCINATE SYNTHASE ZMO\_R804635  
ASPARAGINASE ZMO\_R807565  
ASPARTATE AMINOTRANSFERASE FAMILY PROTEIN ZMO\_R806175  
ASPARTATE-ALANINE ANTIPORTER ZMO\_R807555  
ASPARTATE-SEMIALDEHYDE DEHYDROGENASE ZMO\_R806290  
ASP-TRNA(ASN)/GLU-TRNA(GLN) AMIDOTRANSFERASE SUBUNIT GATA ZMO\_R803490  
ASP-TRNA(ASN)/GLU-TRNA(GLN) AMIDOTRANSFERASE SUBUNIT GATC ZMO\_R803495  
ATP PHOSPHORIBOSYLTRANSFERASE REGULATORY SUBUNIT ZMO\_R807580  
ATP SYNTHASE F1 SUBUNIT EPSILON ZMO\_R801050  
ATPASE ZMO\_R802425  
ATPASE ZMO\_R802985  
ATP-BINDING CASSETTE DOMAIN-CONTAINING PROTEIN ZMO\_R800465  
ATP-BINDING CASSETTE DOMAIN-CONTAINING PROTEIN ZMO\_R804560  
ATP-BINDING CASSETTE DOMAIN-CONTAINING PROTEIN ZMO\_R807140  
ATP-DEPENDENT CHAPERONE CLPB ZMO\_R806375  
ATP-DEPENDENT CLP ENDOPEPTIDASE PROTEOLYTIC SUBUNIT CLPP ZMO\_R804250  
ATP-DEPENDENT CLP PROTEASE ATP-BINDING SUBUNIT CLPA ZMO\_R801740  
ATP-DEPENDENT CLP PROTEASE ATP-BINDING SUBUNIT CLPX ZMO\_R804255  
ATP-DEPENDENT DNA HELICASE ZMO\_R803980  
ATP-DEPENDENT PROTEASE ATPASE SUBUNIT HSLU ZMO\_R801070  
ATP-DEPENDENT PROTEASE SUBUNIT HSLV ZMO\_R801065  
AUTOTRANSPORTER DOMAIN-CONTAINING PROTEIN ZMO\_R800915  
AUTOTRANSPORTER DOMAIN-CONTAINING PROTEIN ZMO\_R806635  
BACTERIOFERRITIN ZMO\_R806310  
BACTERIOFERRITIN ZMO\_R807120  
BAPA PREFIX-LIKE DOMAIN-CONTAINING PROTEIN ZMO\_R801090  
BAX INHIBITOR-1/YCCA FAMILY PROTEIN ZMO\_R806045  
BETA-GALACTOSIDASE ZMO\_R804035  
BETA-KETOACYL-ACP SYNTHASE II ZMO\_R805725  
BETA-N-ACETYLHEXOSAMINIDASE ZMO\_R805245  
BIFUNCTIONAL 4-HYDROXY-2-OXOGLUTARATE ALDOLASE/2-DEHYDRO-3-DEOXY-PHOSPHOGLUCONATE ALDOLASE ZMO\_R804455  
BIFUNCTIONAL ASPARTATE TRANSAMINASE/ASPARTATE 4-DECARBOXYLASE ZMO\_R807560  
BIFUNCTIONAL POLYLPOLYGLUTAMATE SYNTHASE/DIHYDROFOLATE SYNTHASE ZMO\_R802585  
BIFUNCTIONAL PHOSPHORIBOSYLAMINOIMIDAZOLECARBOXAMIDE FORMYLTRANSFERASE/IMP CYCLOHYDROLASE ZMO\_R800130  
BIOPOLYMER TRANSPORTER EXBD ZMO\_R807715  
BIOPOLYMER TRANSPORTER EXBD ZMO\_R807720  
BIOSYNTHETIC-TYPE ACETOLACTATE SYNTHASE LARGE SUBUNIT ZMO\_R805095  
C40 FAMILY PEPTIDASE ZMO\_R803590  
CAPSULAR POLYSACCHARIDE BIOSYNTHESIS PROTEIN ZMO\_R801325  
CAPSULAR POLYSACCHARIDE BIOSYNTHESIS PROTEIN ZMO\_R805815  
CAPSULE BIOSYNTHESIS PHOSPHATASE ZMO\_R805810  
CARBOHYDRATE PORIN ZMO\_R800270  
CARBOHYDRATE PORIN ZMO\_R803785  
CARBOHYDRATE PORIN ZMO\_R808390  
CARBOHYDRATE PORIN ZMO\_R808390  
CARBONIC ANHYDRASE ZMO\_R805065  
CARBON-NITROGEN HYDROLASE FAMILY PROTEIN ZMO\_R805415  
CATALASE ZMO\_R804105  
CATA-LIKE O-ACETYLTRANSFERASE ZMO\_R805115  
CATION:PROTON ANTIPORTER ZMO\_R803780  
CELL DIVISION PROTEIN ETS2 ZMO\_R803745  
CELL WALL HYDROLASE ZMO\_R801935  
CHEMOTAXIS PROTEIN CHEW ZMO\_R800320  
CHORISMATE MUTASE ZMO\_R802500  
CINA FAMILY PROTEIN ZMO\_R805050  
CLASS A BETA-LACTAMASE ZMO\_R808985  
CLASS I FRUCTOSE-BISPHOSPHATE ALDOLASE ZMO\_R800765  
CLASS I SAM-DEPENDENT METHYLTRANSFERASE ZMO\_R804625  
CLASS II FRUCTOSE-BISPHOSPHATASE ZMO\_R802075  
COBALTOCHELATASE SUBUNIT COBT ZMO\_R806905  
COLD SHOCK DOMAIN-CONTAINING PROTEIN ZMO\_R804140  
COLD-SHOCK PROTEIN ZMO\_R801220  
COMEC/REC2 FAMILY COMPETENCE PROTEIN ZMO\_R808975  
COMF FAMILY PROTEIN ZMO\_R805790  
COMPETENCE/DAMAGE-INDUCIBLE PROTEIN A ZMO\_R806035  
COPD FAMILY PROTEIN ZMO\_R809090  
COPPER-TRANSLOCATING P-TYPE ATPASE ZMO\_R804090  
COPROPORPHYRINOGEN III OXIDASE ZMO\_R800060  
CROSSOVER JUNCTION ENDOXYRIBONUCLEASE RUVF ZMO\_R800650  
CSBD FAMILY PROTEIN ZMO\_R803310  
CTP SYNTHASE ZMO\_R801990  
CYSTEINE DESULFURASE NIFS ZMO\_R808255  
CYSTEINE DESULFURASE ZMO\_R801840  
CYSTEINE--TRNA LIGASE ZMO\_R800790  
CYTOCHROME C BIOSYNTHESIS PROTEIN ZMO\_R805610  
CYTOCHROME C MATURATION PROTEIN CMCE ZMO\_R805630  
CYTOCHROME D UBIQUINOL OXIDASE SUBUNIT II ZMO\_R807030  
CYTOCHROME UBIQUINOL OXIDASE SUBUNIT I ZMO\_R807025  
DCTP DEAMINASE ZMO\_R803855  
DEAMINATED GLUTATHIONE AMIDASE ZMO\_R806445  
DEMETHOXYUBIQUINONE HYDROXYLASE FAMILY PROTEIN ZMO\_R807500  
DEMETHYLMENAQUINONE METHYLTRANSFERASE ZMO\_R808900  
DEOXYHYPPUSINE SYNTHASE ZMO\_R804570  
DIENELACTONE HYDROLASE FAMILY PROTEIN ZMO\_R809075  
DIHYDRODIPICOLINATE SYNTHASE FAMILY PROTEIN ZMO\_R808335  
DIHYDROOROTASE ZMO\_R807595  
DISULFIDE BOND FORMATION PROTEIN B ZMO\_R807495  
DMT FAMILY TRANSPORTER ZMO\_R800120  
DNA POLYMERASE III SUBUNIT BETA ZMO\_R804390  
DNA POLYMERASE III SUBUNIT CHI ZMO\_R805860  
DNA POLYMERASE III SUBUNIT DELTA ZMO\_R806415  
DNA PRIMASE ZMO\_R807270

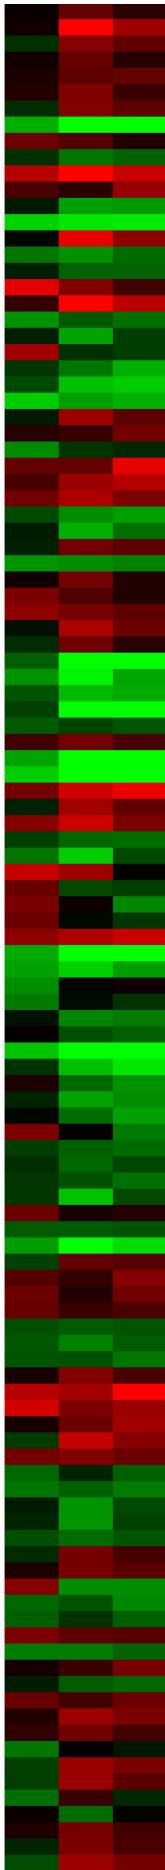

DNA RECOMBINATION PROTEIN RMUC ZMO\_R803630  
DNA REPAIR PROTEIN RAD5 ZMO\_R808780  
DNA REPLICATION/REPAIR PROTEIN REC7 ZMO\_R807115  
DNA TOPOISOMERASE (ATP-HYDROLYZING) SUBUNIT B ZMO\_R807110  
DNA TOPOISOMERASE IV SUBUNIT B ZMO\_R801770  
DNA TRANSLOCASE FTSK ZMO\_R807660  
DNA-3-METHYLADEININE GLYCOSYLASE 2 FAMILY PROTEIN ZMO\_R801620  
DNA-DIRECTED RNA POLYMERASE SUBUNIT ALPHA ZMO\_R802380  
DNA-DIRECTED RNA POLYMERASE SUBUNIT BETA\\' ZMO\_R803270  
DNA-DIRECTED RNA POLYMERASE SUBUNIT OMEGA ZMO\_R807745  
DNAJ DOMAIN-CONTAINING PROTEIN ZMO\_R807600  
DNTP TRIPHOSPHOHYDROLASE ZMO\_R806650  
DO FAMILY SERINE ENDOPEPTIDASE ZMO\_R801015  
DUF1013 DOMAIN-CONTAINING PROTEIN ZMO\_R803830  
DUF1016 FAMILY PROTEIN ZMO\_R808770  
DUF192 DOMAIN-CONTAINING PROTEIN ZMO\_R803960  
DUF2093 DOMAIN-CONTAINING PROTEIN ZMO\_R806815  
DUF2141 DOMAIN-CONTAINING PROTEIN ZMO\_R806220  
DUF2285 DOMAIN-CONTAINING PROTEIN ZMO\_R808815  
DUF2474 DOMAIN-CONTAINING PROTEIN ZMO\_R807035  
DUF2497 DOMAIN-CONTAINING PROTEIN ZMO\_R808500  
DUF308 DOMAIN-CONTAINING PROTEIN ZMO\_R806870  
DUF3297 FAMILY PROTEIN ZMO\_R807830  
DUF3576 DOMAIN-CONTAINING PROTEIN ZMO\_R806430  
DUF3617 FAMILY PROTEIN ZMO\_R805605  
DUF4136 DOMAIN-CONTAINING PROTEIN ZMO\_R805580  
DUF4136 DOMAIN-CONTAINING PROTEIN ZMO\_R807365  
DUF4167 DOMAIN-CONTAINING PROTEIN ZMO\_R806780  
DUF4186 DOMAIN-CONTAINING PROTEIN ZMO\_R804520  
DUF423 DOMAIN-CONTAINING PROTEIN ZMO\_R802635  
DUF445 DOMAIN-CONTAINING PROTEIN ZMO\_R801255  
DUF459 DOMAIN-CONTAINING PROTEIN ZMO\_R801915  
DUF465 DOMAIN-CONTAINING PROTEIN ZMO\_R804430  
DUF5309 DOMAIN-CONTAINING PROTEIN ZMO\_R801655  
DUF721 DOMAIN-CONTAINING PROTEIN ZMO\_R807530  
EFFLUX RND TRANSPORTER PERIPLASMIC ADAPTOR SUBUNIT ZMO\_R803470  
ELECTRON TRANSFER FLAVOPROTEIN SUBUNIT ALPHA ZMO\_R806620  
ELECTRON TRANSFER FLAVOPROTEIN SUBUNIT BETA/FIXA FAMILY PROTEIN ZMO\_R806625  
ELECTRON TRANSPORT COMPLEX SUBUNIT RSXC ZMO\_R808145  
ELECTRON TRANSPORT COMPLEX SUBUNIT RSXG ZMO\_R808135  
ELONGATION FACTOR G ZMO\_R802245  
ELONGATION FACTOR P ZMO\_R801410  
ELONGATION FACTOR TS ZMO\_R805175  
ELONGATION FACTOR TU ZMO\_R802250  
ENDOLYTIC TRANSGLYCOSYLASE MLTG ZMO\_R805720  
ENDOPEPTIDASE LA ZMO\_R801615  
ENERGY TRANSDUCER TONB ZMO\_R807730  
ENERGY-DEPENDENT TRANSLATIONAL THROTTLE PROTEIN ETTA ZMO\_R800780  
EPOXYQUEUOSINE REDUCTASE QUEH ZMO\_R808540  
ETHANOLAMINE PERMEASE ZMO\_R806160  
EXCINUCLEASE ABC SUBUNIT UVRB ZMO\_R801550  
EXODEOXYRIBONUCLEASE III ZMO\_R806260  
EXODEOXYRIBONUCLEASE VII SMALL SUBUNIT ZMO\_R803825  
F0F1 ATP SYNTHASE SUBUNIT ALPHA ZMO\_R801035  
F0F1 ATP SYNTHASE SUBUNIT C ZMO\_R802975  
F0F1 ATP SYNTHASE SUBUNIT DELTA ZMO\_R801030  
F0F1 ATP SYNTHASE SUBUNIT GAMMA ZMO\_R801040  
FAD:PROTEIN FMN TRANSFERASE ZMO\_R808290  
FERREDOXIN FAMILY PROTEIN ZMO\_R800940  
FERREDOXIN--NADP REDUCTASE ZMO\_R807885  
FERROUS IRON TRANSPORT PROTEIN A ZMO\_R806890  
FKBP-TYPE PEPTIDYL-PROLYL CIS-TRANS ISOMERASE ZMO\_R807705  
FLAGELLAR BASAL BODY L-RING PROTEIN FLGH ZMO\_R802705  
FLAGELLAR BASAL BODY P-RING PROTEIN FLGI ZMO\_R802700  
FLAGELLAR BASAL BODY ROD PROTEIN FLGB ZMO\_R802735  
FLAGELLAR BASAL BODY ROD PROTEIN FLGC ZMO\_R802730  
FLAGELLAR BASAL-BODY ROD PROTEIN FLGF ZMO\_R802715  
FLAGELLAR BASAL-BODY ROD PROTEIN FLGG ZMO\_R802710  
FLAGELLAR HOOK CAPPING PROTEIN ZMO\_R802725  
FLAGELLAR HOOK-BASAL BODY COMPLEX PROTEIN ZMO\_R802720  
FLAGELLAR MOTOR SWITCH PROTEIN FLIG ZMO\_R802815  
FLAGELLAR MOTOR SWITCH PROTEIN FLIN ZMO\_R802855  
FLAGELLAR M-RING PROTEIN FLIF ZMO\_R802810  
FLAGELLAR PROTEIN FLIS ZMO\_R802890  
FLAGELLIN ZMO\_R802795  
FORMATE--TETRAHYDROFOLATE LIGASE ZMO\_R801960  
FYDLN ACID DOMAIN-CONTAINING PROTEIN ZMO\_R808075  
GLSE/YEAQ/YMGE FAMILY STRESS RESPONSE MEMBRANE PROTEIN ZMO\_R805765  
GLUCONOKINASE ZMO\_R807905  
GLUCOSE-6-PHOSPHATE ISOMERASE ZMO\_R805445  
GLUTAMATE 5-KINASE ZMO\_R800890  
GLUTAMATE--TRNA LIGASE ZMO\_R804015  
GLUTAMINE-HYDROLYZING CARBAMOYL-PHOSPHATE SYNTHASE SMALL SUBUNIT ZMO\_R807260  
GLUTAMINE-HYDROLYZING GMP SYNTHASE ZMO\_R805670  
GLUTAMINYL-PEPTIDE CYCLOTRANSFERASE ZMO\_R808505  
GLUTAREDOXIN 2 ZMO\_R800290  
GLUTAREDOXIN 3 ZMO\_R803370  
GLUTATHIONE-DISULFIDE REDUCTASE ZMO\_R805440  
GLYCERATE KINASE ZMO\_R800250  
GLYCINE ZIPPER 2TM DOMAIN-CONTAINING PROTEIN ZMO\_R801875  
GLYCINE--TRNA LIGASE SUBUNIT ALPHA ZMO\_R806475  
GLYCINE--TRNA LIGASE SUBUNIT BETA ZMO\_R806470  
GLYCOSYL TRANSFERASE FAMILY 2 ZMO\_R802790  
GLYCOSYLTRANSFERASE FAMILY 2 PROTEIN ZMO\_R805820  
GLYCOSYLTRANSFERASE ZMO\_R804245  
GLYCOSYLTRANSFERASE ZMO\_R807815  
GLYOXYLATE/HYDROXYPYRUVATE REDUCTASE A ZMO\_R808535  
GNAT FAMILY N-ACETYLTRANSFERASE ZMO\_R800900  
GNTP FAMILY PERMEASE ZMO\_R807900  
GTPASE ERA ZMO\_R806180  
GTPASE OBGE ZMO\_R800895  
GUANYLATE KINASE ZMO\_R801870  
HAD FAMILY PHOSPHATASE ZMO\_R808410  
HAD-IB FAMILY HYDROLASE ZMO\_R802925  
HEAT-INDUCIBLE TRANSCRIPTIONAL REPRESSOR HRCA ZMO\_R800075  
HELICASE ZMO\_R800935  
HELIX-TURN-HELIX DOMAIN-CONTAINING PROTEIN ZMO\_R800875  
HELIX-TURN-HELIX TRANSCRIPTIONAL REGULATOR ZMO\_R803120  
HEME ABC EXPORTER ATP-BINDING PROTEIN CCMA ZMO\_R801125  
HEME LYASE CCMP/NRFE FAMILY SUBUNIT ZMO\_R805625  
HEPARINASE II/III FAMILY PROTEIN ZMO\_R800095  
HISTIDINE KINASE ZMO\_R803055  
HYD FAMILY EFFLUX TRANSPORTER PERIPLASMIC ADAPTOR SUBUNIT ZMO\_R801105  
HOLLIDAY JUNCTION BRANCH MIGRATION PROTEIN RUVA ZMO\_R800655  
HOMOCITRATE SYNTHASE ZMO\_R808260

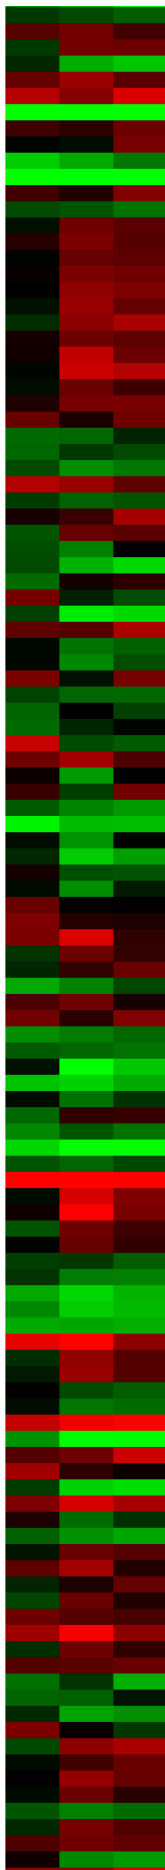

HOMOSERINE KINASE ZMO\_RS07180  
HOMOSERINE O-ACETYLTRANSFERASE ZMO\_RS00965  
HPNL FAMILY PROTEIN ZMO\_RS04365  
HPNM FAMILY PROTEIN ZMO\_RS03920  
HPR FAMILY PHOSPHOCARRIER PROTEIN ZMO\_RS05950  
HSP20 FAMILY PROTEIN ZMO\_RS04435  
HU FAMILY DNA-BINDING PROTEIN ZMO\_RS01060  
HYDROXYACYLGLUTATHIONE HYDROLASE ZMO\_RS03395  
HYPOTHETICAL PROTEIN ZMO\_RS00055  
HYPOTHETICAL PROTEIN ZMO\_RS00660  
HYPOTHETICAL PROTEIN ZMO\_RS00785  
HYPOTHETICAL PROTEIN ZMO\_RS00995  
HYPOTHETICAL PROTEIN ZMO\_RS01285  
HYPOTHETICAL PROTEIN ZMO\_RS01635  
HYPOTHETICAL PROTEIN ZMO\_RS01640  
HYPOTHETICAL PROTEIN ZMO\_RS01645  
HYPOTHETICAL PROTEIN ZMO\_RS01660  
HYPOTHETICAL PROTEIN ZMO\_RS01665  
HYPOTHETICAL PROTEIN ZMO\_RS01670  
HYPOTHETICAL PROTEIN ZMO\_RS01675  
HYPOTHETICAL PROTEIN ZMO\_RS01690  
HYPOTHETICAL PROTEIN ZMO\_RS01695  
HYPOTHETICAL PROTEIN ZMO\_RS01700  
HYPOTHETICAL PROTEIN ZMO\_RS01705  
HYPOTHETICAL PROTEIN ZMO\_RS01715  
HYPOTHETICAL PROTEIN ZMO\_RS01895  
HYPOTHETICAL PROTEIN ZMO\_RS02050  
HYPOTHETICAL PROTEIN ZMO\_RS02070  
HYPOTHETICAL PROTEIN ZMO\_RS02785  
HYPOTHETICAL PROTEIN ZMO\_RS03000  
HYPOTHETICAL PROTEIN ZMO\_RS03335  
HYPOTHETICAL PROTEIN ZMO\_RS03430  
HYPOTHETICAL PROTEIN ZMO\_RS03535  
HYPOTHETICAL PROTEIN ZMO\_RS03635  
HYPOTHETICAL PROTEIN ZMO\_RS03680  
HYPOTHETICAL PROTEIN ZMO\_RS04165  
HYPOTHETICAL PROTEIN ZMO\_RS04505  
HYPOTHETICAL PROTEIN ZMO\_RS04955  
HYPOTHETICAL PROTEIN ZMO\_RS05405  
HYPOTHETICAL PROTEIN ZMO\_RS05460  
HYPOTHETICAL PROTEIN ZMO\_RS05785  
HYPOTHETICAL PROTEIN ZMO\_RS05825  
HYPOTHETICAL PROTEIN ZMO\_RS05890  
HYPOTHETICAL PROTEIN ZMO\_RS05900  
HYPOTHETICAL PROTEIN ZMO\_RS05910  
HYPOTHETICAL PROTEIN ZMO\_RS06135  
HYPOTHETICAL PROTEIN ZMO\_RS06210  
HYPOTHETICAL PROTEIN ZMO\_RS06240  
HYPOTHETICAL PROTEIN ZMO\_RS06245  
HYPOTHETICAL PROTEIN ZMO\_RS06420  
HYPOTHETICAL PROTEIN ZMO\_RS06530  
HYPOTHETICAL PROTEIN ZMO\_RS06560  
HYPOTHETICAL PROTEIN ZMO\_RS06580  
HYPOTHETICAL PROTEIN ZMO\_RS06610  
HYPOTHETICAL PROTEIN ZMO\_RS06640  
HYPOTHETICAL PROTEIN ZMO\_RS06755  
HYPOTHETICAL PROTEIN ZMO\_RS07230  
HYPOTHETICAL PROTEIN ZMO\_RS07235  
HYPOTHETICAL PROTEIN ZMO\_RS07305  
HYPOTHETICAL PROTEIN ZMO\_RS07310  
HYPOTHETICAL PROTEIN ZMO\_RS07325  
HYPOTHETICAL PROTEIN ZMO\_RS07515  
HYPOTHETICAL PROTEIN ZMO\_RS07650  
HYPOTHETICAL PROTEIN ZMO\_RS07735  
HYPOTHETICAL PROTEIN ZMO\_RS07785  
HYPOTHETICAL PROTEIN ZMO\_RS07875  
HYPOTHETICAL PROTEIN ZMO\_RS07880  
HYPOTHETICAL PROTEIN ZMO\_RS08030  
HYPOTHETICAL PROTEIN ZMO\_RS08045  
HYPOTHETICAL PROTEIN ZMO\_RS08520  
HYPOTHETICAL PROTEIN ZMO\_RS08580  
HYPOTHETICAL PROTEIN ZMO\_RS08625  
HYPOTHETICAL PROTEIN ZMO\_RS08720  
HYPOTHETICAL PROTEIN ZMO\_RS08790  
HYPOTHETICAL PROTEIN ZMO\_RS08835  
HYPOTHETICAL PROTEIN ZMO\_RS09020  
IMIDAZOLE GLYCEROL PHOSPHATE SYNTHASE SUBUNIT HISF ZMO\_RS06725  
IMIDAZOLEGLYCEROL-PHOSPHATE DEHYDRATASE HISB ZMO\_RS06740  
IMP DEHYDROGENASE ZMO\_RS05920  
INORGANIC DIPHOSPHATASE ZMO\_RS06760  
INOSITOL MONOPHOSPHATASE FAMILY PROTEIN ZMO\_RS06805  
INOSITOL MONOPHOSPHATASE ZMO\_RS01415  
INTEGRATION HOST FACTOR SUBUNIT BETA ZMO\_RS08100  
IRON ABC TRANSPORTER PERMEASE ZMO\_RS00985  
IRON ABC TRANSPORTER PERMEASE ZMO\_RS08310  
IRON-CONTAINING ALCOHOL DEHYDROGENASE ZMO\_RS07970  
IRON-SULFUR CLUSTER ASSEMBLY ACCESSORY PROTEIN ZMO\_RS06265  
IRON-SULFUR CLUSTER ASSEMBLY SCAFFOLD PROTEIN ZMO\_RS02630  
KETOL-ACID REDUCTOISOMERASE ZMO\_RS05105  
L-2-AMINO-THIAZOLINE-4-CARBOXYLIC ACID HYDROLASE ZMO\_RS01345  
LACTATE UTILIZATION PROTEIN ZMO\_RS00105  
LARGE CONDUCTANCE MECHANOSENSITIVE CHANNEL PROTEIN MSC1 ZMO\_RS04675  
L-ASPARTATE OXIDASE ZMO\_RS00610  
LEMA FAMILY PROTEIN ZMO\_RS04670  
LEUCINE--TRNA LIGASE ZMO\_RS06425  
LEUCYL AMINOPEPTIDASE FAMILY PROTEIN ZMO\_RS03595  
LEUCYL AMINOPEPTIDASE ZMO\_RS05865  
LEUCYL/PHENYLALANYL-TRNA--PROTEIN TRANSFERASE ZMO\_RS04150  
LIPOPOLYSACCHARIDE BIOSYNTHESIS PROTEIN ZMO\_RS00980  
LL-DIAMINOPELMATE AMINOTRANSFERASE ZMO\_RS07780  
LON PEPTIDASE SUBSTRATE-BINDING DOMAIN-CONTAINING PROTEIN ZMO\_RS07670  
LOW MOLECULAR WEIGHT PHOSPHOTYROSINE PROTEIN PHOSPHATASE ZMO\_RS00590  
LPS EXPORT ABC TRANSPORTER PERMEASE LPTF ZMO\_RS06225  
LPTA/OSTA FAMILY PROTEIN ZMO\_RS01205  
LRF/ASNC FAMILY TRANSCRIPTIONAL REGULATOR ZMO\_RS01970  
LRF/ASNC FAMILY TRANSCRIPTIONAL REGULATOR ZMO\_RS04950  
LUD DOMAIN-CONTAINING PROTEIN ZMO\_RS00100  
LYSE FAMILY TRANSLOCATOR ZMO\_RS00205  
LYSE FAMILY TRANSLOCATOR ZMO\_RS05990  
LYSR FAMILY TRANSCRIPTIONAL REGULATOR ZMO\_RS00210  
LYSR FAMILY TRANSCRIPTIONAL REGULATOR ZMO\_RS05980  
LYSR FAMILY TRANSCRIPTIONAL REGULATOR ZMO\_RS07805  
LYSR FAMILY TRANSCRIPTIONAL REGULATOR ZMO\_RS08065  
LYTIC MUREIN TRANSGLYCOSYLASE ZMO\_RS04860  
M13 FAMILY METALLOPEPTIDASE ZMO\_RS03220



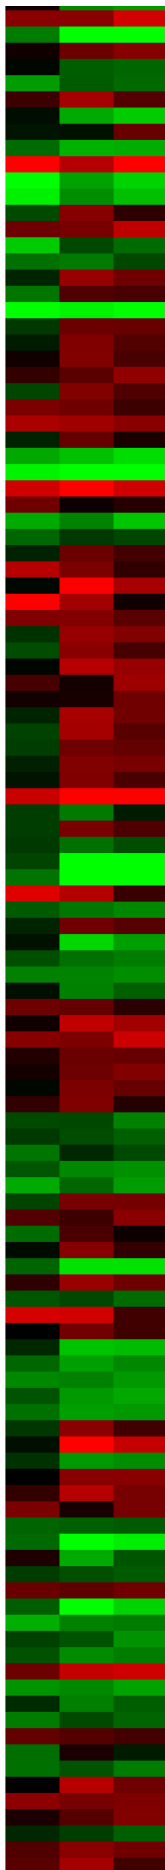

M20 PEPTIDASE AMINOACYLASE FAMILY PROTEIN ZMO\_R801340  
M23 FAMILY METALLOPEPTIDASE ZMO\_R806270  
M48 FAMILY METALLOPEPTIDASE ZMO\_R800050  
MANNOSE-1-PHOSPHATE GUANYLYLTRANSFERASE/MANNOSE-6-PHOSPHATE ISOMERASE ZMO\_R805545  
MARC FAMILY PROTEIN ZMO\_R801775  
MCE FAMILY PROTEIN ZMO\_R804555  
MECHANOTENSITIVE ION CHANNEL ZMO\_R805965  
MEMBRANE LIPOPROTEIN LIPID ATTACHMENT SITE-CONTAINING PROTEIN ZMO\_R807340  
MEMBRANE PROTEIN INSERTASE YDC ZMO\_R807290  
MERC DOMAIN-CONTAINING PROTEIN ZMO\_R803955  
METALLOREGULATOR ARSR/SMTB FAMILY TRANSCRIPTION FACTOR ZMO\_R807860  
METHIONINE ADENOSYLTRANSFERASE ZMO\_R801190  
METHYL-ACCEPTING CHEMOTAXIS PROTEIN ZMO\_R800355  
METHYLATED-DNA- ZMO\_R809070  
METHYLENETETRAHYDROFOLATE REDUCTASE ZMO\_R807855  
METHYLENETETRAHYDROFOLATE--TRNA-(URACIL(54)-C(5))-METHYLTRANSFERASE (FADH(2)-OXIDIZING) TRMFO ZMO\_R803080  
MFS TRANSPORTER ZMO\_R800215  
MFS TRANSPORTER ZMO\_R800410  
MFS TRANSPORTER ZMO\_R806525  
MFS TRANSPORTER ZMO\_R807055  
MFS TRANSPORTER ZMO\_R808350  
MFS TRANSPORTER ZMO\_R809025  
MLIC FAMILY PROTEIN ZMO\_R804115  
MODD PROTEIN ZMO\_R808270  
MOLECULAR CHAPERONE DNAJ ZMO\_R802935  
MOLECULAR CHAPERONE DNAK ZMO\_R802930  
MONOFUNCTIONAL BIOSYNTHETIC PEPTIDOGLYCAN TRANSGLYCOSYLASE ZMO\_R804290  
MOT/TOLO/EXEBB PROTON CHANNEL FAMILY PROTEIN ZMO\_R807725  
MUCR FAMILY TRANSCRIPTIONAL REGULATOR ZMO\_R806320  
MULTISPECIES: HELIX-TURN-HELIX DOMAIN-CONTAINING PROTEIN ZMO\_R808820  
MULTISPECIES: L-THREONINE DEHYDROGENASE ZMO\_R807165  
MULTISPECIES: TRANSLATION INITIATION FACTOR IF-1 ZMO\_R804545  
MUREIN TRANSGLYCOSYLASE A ZMO\_R807335  
N-ACETYLGLUCOSAMINE-6-PHOSPHATE DEACETYLASE ZMO\_R804300  
NAD(P)H: QUINONE OXIDOREDUCTASE ZMO\_R805975  
NAD(P)H-DEPENDENT OXIDOREDUCTASE ZMO\_R808880  
NAD-DEPENDENT SUCCINATE-SEMIALDEHYDE DEHYDROGENASE ZMO\_R807890  
NIFU FAMILY PROTEIN ZMO\_R806335  
NIFU FAMILY PROTEIN ZMO\_R808250  
NIFX-ASSOCIATED NITROGEN FIXATION PROTEIN ZMO\_R808230  
NITROGEN FIXATION PROTEIN NIFX ZMO\_R808225  
NITROGEN FIXATION PROTEIN NIFZ ZMO\_R808180  
NITROGENASE COFACTOR BIOSYNTHESIS PROTEIN NIFB ZMO\_R808170  
NITROGENASE IRON PROTEIN ZMO\_R808200  
NITROGENASE IRON-MOLYBDENUM COFACTOR BIOSYNTHESIS PROTEIN NIFE ZMO\_R808215  
NITROGENASE IRON-MOLYBDENUM COFACTOR BIOSYNTHESIS PROTEIN NIFN ZMO\_R808220  
NITROGENASE MOLYBDENUM-IRON PROTEIN ALPHA CHAIN ZMO\_R808205  
NITROGENASE MOLYBDENUM-IRON PROTEIN SUBUNIT BETA ZMO\_R808210  
NITRONATE MONOOXYGENASE ZMO\_R808400  
NUCLEAR TRANSPORT FACTOR 2 FAMILY PROTEIN ZMO\_R801010  
NUCLEOSIDE TRANSPORTER ZMO\_R804325  
NUCLEOTIDYLTRANSFERASE FAMILY PROTEIN ZMO\_R804925  
OMPA FAMILY PROTEIN ZMO\_R806055  
OMPH FAMILY OUTER MEMBRANE PROTEIN ZMO\_R805135  
ORGANIC HYDROPEROXIDE RESISTANCE PROTEIN ZMO\_R803090  
OROTIDINE-5\'\'-PHOSPHATE DECARBOXYLASE ZMO\_R802610  
OUTER MEMBRANE BETA-BARREL PROTEIN ZMO\_R806155  
OUTER MEMBRANE BETA-BARREL PROTEIN ZMO\_R806675  
OUTER MEMBRANE PROTEIN ASSEMBLY FACTOR BAMA ZMO\_R805140  
OUTER MEMBRANE PROTEIN ASSEMBLY FACTOR BAMD ZMO\_R807910  
OUTER MEMBRANE PROTEIN ASSEMBLY FACTOR BAME ZMO\_R808660  
OXIDOREDUCTASE ZMO\_R808295  
PAAI FAMILY THIOESTERASE ZMO\_R808890  
PANTOATE--BETA-ALANINE LIGASE ZMO\_R809000  
PARA FAMILY PROTEIN ZMO\_R809035  
PAS-DOMAIN CONTAINING PROTEIN ZMO\_R804935  
PBSX FAMILY PHAGE TERMINASE LARGE SUBUNIT ZMO\_R801630  
PENICILLIN-BINDING PROTEIN 2 ZMO\_R801535  
PENICILLIN-BINDING PROTEIN 2 ZMO\_R803685  
PEPTIDE CHAIN RELEASE FACTOR 2 ZMO\_R800850  
PEPTIDOGLYCAN DD-METALLOENDOPEPTIDASE FAMILY PROTEIN ZMO\_R807485  
PEPTIDYLPROLYL ISOMERASE ZMO\_R802005  
PEPTIDYLPROLYL ISOMERASE ZMO\_R803445  
PHAGE MAJOR TAIL TUBE PROTEIN ZMO\_R800285  
PHAGE SHOCK PROTEIN PSPA ZMO\_R804755  
PHOSPHATASE PAP2 FAMILY PROTEIN ZMO\_R800545  
PHOSPHATASE PAP2 FAMILY PROTEIN ZMO\_R802230  
PHOSPHATE ACYLTRANSFERASE PLXZ ZMO\_R808620  
PHOSPHATE REGULON TRANSCRIPTIONAL REGULATOR PHOB ZMO\_R805215  
PHOSPHOENOLPYRUVATE CARBOXYLASE ZMO\_R806705  
PHOSPHOGLUCONATE DEHYDRATASE ZMO\_R801575  
PHOSPHO-N-ACETYLMURAMOYL-PENTAPEPTIDE-TRANSFERASE ZMO\_R803700  
PHOSPHORIBOSYLAMINOIMIDAZOLESUCCINOCARBOXAMIDE SYNTHASE ZMO\_R804710  
PHOSPHORIBOSYLANTHRANILATE ISOMERASE ZMO\_R802605  
PHOSPHORIBOSYL-ATP DIPHOSPHATASE ZMO\_R806720  
PHOSPHORIBOSYLTRANSFERASE ZMO\_R802910  
PHOSPHOSERINE TRANSAMINASE ZMO\_R807570  
PHOSPHOTRANSFERASE ZMO\_R806170  
PHZF FAMILY PHENAZINE BIOSYNTHESIS PROTEIN ZMO\_R808860  
P-II FAMILY NITROGEN REGULATOR ZMO\_R802130  
PLP-DEPENDENT AMINOTRANSFERASE FAMILY PROTEIN ZMO\_R808340  
PLP-DEPENDENT AMINOTRANSFERASE FAMILY PROTEIN ZMO\_R808855  
POLYISOPRENOL-BINDING PROTEIN ZMO\_R805970  
POLYPRENYL SYNTHETASE FAMILY PROTEIN ZMO\_R803820  
POLYRIBONUCLEOTIDE NUCLEOTIDYLTRANSFERASE ZMO\_R802430  
PORIN FAMILY PROTEIN ZMO\_R806680  
PORPHOBILINOGEN SYNTHASE ZMO\_R808515  
PQQ-DEPENDENT SUGAR DEHYDROGENASE ZMO\_R802475  
PREPROTEIN TRANSLOCASE SUBUNIT SECE ZMO\_R803230  
PREPROTEIN TRANSLOCASE SUBUNIT SECG ZMO\_R801995  
PREPROTEIN TRANSLOCASE SUBUNIT SECY ZMO\_R802360  
PREPROTEIN TRANSLOCASE SUBUNIT YAJC ZMO\_R808605  
PRIMOSOMAL PROTEIN N\'\' ZMO\_R808725  
PROLINE--TRNA LIGASE ZMO\_R801985  
PROTEIN TRANSLOCASE SUBUNIT SECF ZMO\_R808595  
PSEUDOURIDINE SYNTHASE ZMO\_R802570  
PTS SUGAR TRANSPORTER SUBUNIT IIA ZMO\_R805945  
PURINE NUCLEOSIDE PERMEASE ZMO\_R806505  
PYRIDOXAL PHOSPHATE-DEPENDENT AMINOTRANSFERASE ZMO\_R801455  
PYRIDOXAL PHOSPHATE-DEPENDENT AMINOTRANSFERASE ZMO\_R808885  
PYRIDOXINE 5\'\'-PHOSPHATE SYNTHASE ZMO\_R807685  
PYRROLINE-5-CARBOXYLATE REDUCTASE ZMO\_R801335  
PYRUVATE DEHYDROGENASE COMPLEX E1 COMPONENT SUBUNIT BETA ZMO\_R807205  
PYRUVATE FORMATE LYASE-ACTIVATING PROTEIN ZMO\_R807010  
QUINONE OXIDOREDUCTASE ZMO\_R809080

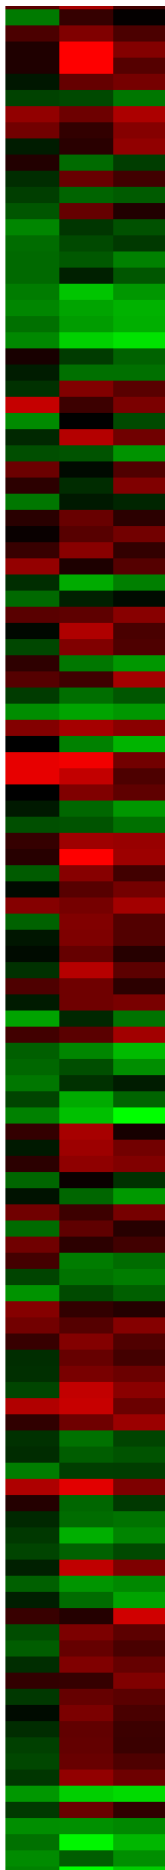

RDGB/HAM1 FAMILY NON-CANONICAL PURINE NTP PYROPHOSPHATASE ZMO\_R800065  
REDOX-REGULATED ATPASE YCHF ZMO\_R808680  
RELAXASE/MOBILIZATION NUCLEASE AND DUF3363 DOMAIN-CONTAINING PROTEIN ZMO\_R808850  
REPLICATION INITIATOR PROTEIN A ZMO\_R809215  
REPLICATION-ASSOCIATED RECOMBINATION PROTEIN A ZMO\_R800510  
RESPONSE REGULATOR TRANSCRIPTION FACTOR ZMO\_R802055  
RESPONSE REGULATOR TRANSCRIPTION FACTOR ZMO\_R806195  
RESPONSE REGULATOR ZMO\_R800325  
RESPONSE REGULATOR ZMO\_R801080  
RESPONSE REGULATOR ZMO\_R806280  
RESTRICTION ENDONUCLEASE ZMO\_R800135  
RHOMBROID FAMILY INTRAMEMBRANE SERINE PROTEASE ZMO\_R807245  
RIBBON-HELIX-HELIX DOMAIN-CONTAINING PROTEIN ZMO\_R801305  
RIBONUCLEASE D ZMO\_R803185  
RIBONUCLEASE E/G ZMO\_R800830  
RIBONUCLEASE HI ZMO\_R807185  
RIBONUCLEASE PH ZMO\_R800070  
RIBONUCLEOSIDE TRIPHOSPHATE REDUCTASE ZMO\_R804595  
RIBONUCLEOSIDE-DIPHOSPHATE REDUCTASE SUBUNIT ALPHA ZMO\_R804645  
RIBOSE 5-PHOSPHATE ISOMERASE B ZMO\_R805385  
RIBOSE-PHOSPHATE PYROPHOSPHOKINASE ZMO\_R806810  
RIBOSOME RECYCLING FACTOR ZMO\_R805165  
RIBOSOME SILENCING FACTOR ZMO\_R807475  
RIBOSOME-ASSOCIATED ATPASE/PUTATIVE TRANSPORTER RBBA ZMO\_R803565  
RIBOSOME-ASSOCIATED TRANSLATION INHIBITOR RAIA ZMO\_R800175  
RIBULOSE-PHOSPHATE 3-EPIMERASE ZMO\_R800090  
RIDA FAMILY PROTEIN ZMO\_R808870  
RIP METALLOPROTEASE RSEF ZMO\_R805145  
RLUA FAMILY PSEUDOURIDINE SYNTHASE ZMO\_R803355  
RNA CHAPERONE HFQ ZMO\_R801480  
RNA METHYLTRANSFERASE ZMO\_R805400  
RNA METHYLTRANSFERASE ZMO\_R805955  
RNA POLYMERASE FACTOR SIGMA-54 ZMO\_R801195  
RNA POLYMERASE SIGMA FACTOR RPOD ZMO\_R807275  
RNA POLYMERASE SIGMA FACTOR RPOH ZMO\_R803350  
RNA POLYMERASE-BINDING PROTEIN DKSA ZMO\_R804425  
RNA PSEUDOURIDINE SYNTHASE ZMO\_R802190  
RNASE ADAPTER RAP2 ZMO\_R805940  
RNFABCDGE TYPE ELECTRON TRANSPORT COMPLEX SUBUNIT B ZMO\_R808150  
ROD SHAPE-DETERMINING PROTEIN RODA ZMO\_R801540  
ROD-BINDING PROTEIN ZMO\_R802695  
ROK FAMILY PROTEIN ZMO\_R807740  
S41 FAMILY PEPTIDASE ZMO\_R807490  
SAPC FAMILY PROTEIN ZMO\_R804515  
SCP2 STEROL-BINDING DOMAIN-CONTAINING PROTEIN ZMO\_R803375  
SDR FAMILY OXIDOREDUCTASE ZMO\_R800380  
SDR FAMILY OXIDOREDUCTASE ZMO\_R801330  
SDR FAMILY OXIDOREDUCTASE ZMO\_R801360  
SDR FAMILY OXIDOREDUCTASE ZMO\_R801450  
SDR FAMILY OXIDOREDUCTASE ZMO\_R806130  
SDR FAMILY OXIDOREDUCTASE ZMO\_R806970  
SDR FAMILY OXIDOREDUCTASE ZMO\_R807050  
SDR FAMILY OXIDOREDUCTASE ZMO\_R808865  
SELL1 REPEAT FAMILY PROTEIN ZMO\_R800125  
SELL1 REPEAT FAMILY PROTEIN ZMO\_R800200  
SELL1 REPEAT FAMILY PROTEIN ZMO\_R800560  
SELL1 REPEAT FAMILY PROTEIN ZMO\_R800565  
SELL1 REPEAT FAMILY PROTEIN ZMO\_R800570  
SELL1-LIKE REPEAT PROTEIN ZMO\_R800280  
SELL1-LIKE REPEAT PROTEIN ZMO\_R800580  
SEPTAL RING LYtic TRANSGLYCOSYLASE RLPA FAMILY PROTEIN ZMO\_R804865  
SEPTUM FORMATION PROTEIN MAF ZMO\_R800195  
SEPTUM FORMATION PROTEIN MAF ZMO\_R804540  
SERINE ACETYLTRANSFERASE ZMO\_R807795  
SERINE HYDROXYMETHYLTRANSFERASE ZMO\_R805390  
SHIKIMATE KINASE ZMO\_R802645  
SIGNAL PEPTIDE PEPTIDASE SPFA ZMO\_R808750  
SIGNAL RECOGNITION PARTICLE PROTEIN ZMO\_R804805  
SIMPL DOMAIN-CONTAINING PROTEIN ZMO\_R801245  
SINGLE-STRANDED DNA-BINDING PROTEIN ZMO\_R806900  
SINGLE-STRANDED-DNA-SPECIFIC EXONUCLEASE RECJ ZMO\_R805530  
SMP-30/GLUCONOLACTONASE/LRE FAMILY PROTEIN ZMO\_R809050  
SMR/MUTS FAMILY PROTEIN ZMO\_R807330  
SORBITOL DEHYDROGENASE FAMILY PROTEIN ZMO\_R803505  
SOXR REDUCING SYSTEM RSEC FAMILY PROTEIN ZMO\_R808285  
SPOR DOMAIN-CONTAINING PROTEIN ZMO\_R803580  
SPOR DOMAIN-CONTAINING PROTEIN ZMO\_R803750  
SPRA-BINDING PROTEIN SMPB ZMO\_R803215  
SUCCINATE DEHYDROGENASE CYTOCHROME B SUBUNIT ZMO\_R802530  
SUCCINYL-DIAMINOPIMELATE DESUCCINYLAZE ZMO\_R807320  
SUCROSE-6-PHOSPHATE HYDROLASE ZMO\_R804220  
SUF SYSTEM FE-S CLUSTER ASSEMBLY PROTEIN ZMO\_R801845  
SUFD FAMILY FE-S CLUSTER ASSEMBLY PROTEIN ZMO\_R801835  
SUGAR PORTER FAMILY MFS TRANSPORTER ZMO\_R801265  
SULFATE ADENYLYLTRANSFERASE SUBUNIT CYSN ZMO\_R800020  
SULFITE EXPORTER TAUE/SAFE FAMILY PROTEIN ZMO\_R800230  
SUPEROXIDE DISMUTASE ZMO\_R804740  
TAIL FIBER DOMAIN-CONTAINING PROTEIN ZMO\_R801710  
TATD FAMILY HYDROLASE ZMO\_R804890  
TETRATRICOPEPTIDE REPEAT PROTEIN ZMO\_R801945  
TETRATRICOPEPTIDE REPEAT PROTEIN ZMO\_R803380  
TETRATRICOPEPTIDE REPEAT PROTEIN ZMO\_R807675  
THIOREDOXIN ZMO\_R804910  
THIOREDOXIN-DISULFIDE REDUCTASE ZMO\_R805110  
THREONINE SYNTHASE ZMO\_R808575  
THREONINE--TRNA LIGASE ZMO\_R803415  
TOLC FAMILY OUTER MEMBRANE PROTEIN ZMO\_R801095  
TOLL/INTERLEUKIN-1 RECEPTOR DOMAIN-CONTAINING PROTEIN ZMO\_R807135  
TOL-PAL SYSTEM PROTEIN TOLE ZMO\_R800695  
TONB FAMILY PROTEIN ZMO\_R804750  
TONB-DEPENDENT RECEPTOR ZMO\_R800005  
TONB-DEPENDENT RECEPTOR ZMO\_R800150  
TONB-DEPENDENT RECEPTOR ZMO\_R800540  
TONB-DEPENDENT RECEPTOR ZMO\_R803520  
TONB-DEPENDENT RECEPTOR ZMO\_R803545  
TONB-DEPENDENT RECEPTOR ZMO\_R804025  
TONB-DEPENDENT RECEPTOR ZMO\_R806600  
TONB-DEPENDENT RECEPTOR ZMO\_R807005  
TONB-DEPENDENT RECEPTOR ZMO\_R808160  
TONB-DEPENDENT SIDEROPHORE RECEPTOR ZMO\_R807315  
TRANSCRIPTION ELONGATION FACTOR GREa ZMO\_R807250  
TRANSCRIPTION ELONGATION FACTOR GREB ZMO\_R803200  
TRANSCRIPTION TERMINATION FACTOR RHO ZMO\_R809085  
TRANSCRIPTION TERMINATION/ANTITERMINATION FACTOR NUSG ZMO\_R803235  
TRANSCRIPTIONAL REPRESSOR NRDR ZMO\_R805395

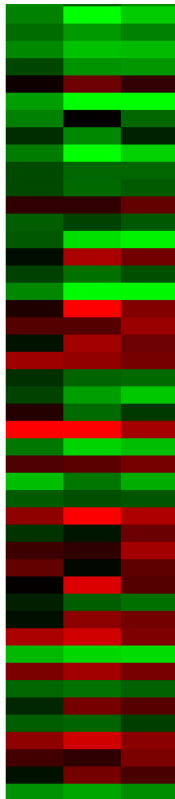

-----  
TRANSCRIPTIONAL REPRESSOR ZMO\_RS06315  
TRANSLATION INITIATION FACTOR IF-3 ZMO\_RS08650  
TRANSLATIONAL GTPASE TYPEA ZMO\_RS06590  
TRIGGER FACTOR ZMO\_RS04240  
TRNA (ADENOSINE(37)-N6)-THREONYLCARBAMOYLTRANSFERASE COMPLEX DIMERIZATION SUBUNIT TYPE 1 TSAB ZMO\_RS06330  
TRNA (GUANOSINE(37)-N1)-METHYLTRANSFERASE TRMD ZMO\_RS04820  
TRNA (GUANOSINE(46)-N7)-METHYLTRANSFERASE TRMB ZMO\_RS00625  
TRNA PREQ1(34) S-ADENOSYLMETHIONINE RIBOSYLTRANSFERASE-ISOMERASE QUEA ZMO\_RS03805  
TRNA PSEUDOURIDINE(55) SYNTHASE TRUB ZMO\_RS02440  
TRYPTOPHAN SYNTHASE SUBUNIT ALPHA ZMO\_RS02595  
TRYPTOPHAN SYNTHASE SUBUNIT BETA ZMO\_RS02600  
TWIN-ARGININE TRANSLOCASE SUBUNIT TATB ZMO\_RS05480  
TYPE I DNA TOPOISOMERASE ZMO\_RS05355  
TYPE I GLUTAMATE--AMMONIA LIGASE ZMO\_RS02135  
TYPE I SECRETION SYSTEM PERMEASE/ATPASE ZMO\_RS01100  
TYPE II 3-DEHYDROQUINATE DEHYDRATASE ZMO\_RS03295  
TYPE III PLP-DEPENDENT ENZYME ZMO\_RS04575  
TYROSINE-TYPE RECOMBINASE/INTEGRASE ZMO\_RS08765  
UBIH/UBIF/VISC/COQ6 FAMILY UBIQUINONE BIOSYNTHESIS HYDROXYLASE ZMO\_RS07665  
UBIQUINOL-CYTOCHROME C REDUCTASE IRON-SULFUR SUBUNIT ZMO\_RS04275  
UDP-GLUCOSE/GDP-MANNOSE DEHYDROGENASE FAMILY PROTEIN ZMO\_RS03650  
UDP-N-ACETYLMURAMOYL-L-ALANYL-D-GLUTAMATE--2,6-DIAMINOPIMELATE LIGASE ZMO\_RS03690  
UMP KINASE ZMO\_RS05170  
URACIL-DNA GLYCOSYLASE ZMO\_RS05310  
UROPORPHYRINOGEN-III C-METHYLTRANSFERASE ZMO\_RS05690  
UTP--GLUCOSE-1-PHOSPHATE URIDYLYLTRANSFERASE GALU ZMO\_RS07950  
UVRD-HELICASE DOMAIN-CONTAINING PROTEIN ZMO\_RS02560  
VACJ FAMILY LIPOPROTEIN ZMO\_RS07865  
VALINE--TRNA LIGASE ZMO\_RS08510  
VIT FAMILY PROTEIN ZMO\_RS08395  
VOC FAMILY PROTEIN ZMO\_RS00145  
VOC FAMILY PROTEIN ZMO\_RS03400  
YBAB/EBFC FAMILY NUCLEOID-ASSOCIATED PROTEIN ZMO\_RS03850  
YBAK/EBSC FAMILY PROTEIN ZMO\_RS08875  
YBGC/FADM FAMILY ACYL-COA THIOESTERASE ZMO\_RS00675  
YCGN FAMILY CYSTEINE CLUSTER PROTEIN ZMO\_RS00155  
YDBL FAMILY PROTEIN ZMO\_RS02960  
YEBC/PMER FAMILY DNA-BINDING TRANSCRIPTIONAL REGULATOR ZMO\_RS00645  
YFDX FAMILY PROTEIN ZMO\_RS03095  
YGGT FAMILY PROTEIN ZMO\_RS01780  
YIFB FAMILY MG CHELATASE-LIKE AAA ATPASE ZMO\_RS07280  
YIHA FAMILY RIBOSOME BIOGENESIS GTP-BINDING PROTEIN ZMO\_RS07295  
YNBE FAMILY LIPOPROTEIN ZMO\_RS02955  
YNFA FAMILY PROTEIN ZMO\_RS06995  
YRAN FAMILY PROTEIN ZMO\_RS07930  
ZINC-RIBBON DOMAIN-CONTAINING PROTEIN ZMO\_RS01785
