# Supplementary material for: The Quorum Sensing Auto-Inducer 2 (AI-2) Stimulates Nitrogen Fixation and Favors Ethanol Production over Biomass Accumulation in Zymomonas mobilis
Source: Int J Mol Sci. 2021 May 26;22(11):5628. doi: 10.3390/ijms22115628 (PMC8198075; doi:10.3390/ijms22115628)
Supplement: Supplementary file 1 [file ijms-22-05628-s001.zip]

Archive with 5 entries (5 files):
- Supplementary/Supplementary Material S1.pdf
- Supplementary/Supplementary Material S2.pdf
- Supplementary/Supplementary Material S3.pdf
- Supplementary/Supplementary Material S4.pdf
- Supplementary/Supplementary Material S5.pdf
